# Supplementary material for: Charge transfer properties of Tröger base derivatives
Source: Royal Society of Chemistry journal article supplement (doi:10.1039/c1cp22086a), 2011-01-01
Supplement: c1cp22086a.pdf [file c1cp22086a.pdf]

## Charge transfer properties of Tröger base derivatives

C. L. Ramírez, [1] C. Pegoraro, [1] L. Trupp, [2] A. Bruttomesso, [2] V. Amorebieta, [1] D. M. A. Vera, [1] A. R. Parise [1]

[1] Departamento de Química, Facultad de Ciencias Exactas y Naturales, Universidad de Mar del Plata, Funes 3350, 7600 Mar del Plata, Argentina.

[2] Departamento de Química Orgánica, Facultad de Ciencias Exactas y Naturales, Universidad de Buenos Aires, Pabellon II, Ciudad Universitaria, 1428 Buenos Aires, Argentina.

### ***Electronic Supporting Information (ESI). Supplementary Material***

---

## Table of Contents

|                                                                                                                                 |    |
|---------------------------------------------------------------------------------------------------------------------------------|----|
| Electronic Supporting Information (ESI). Supplementary Material.....                                                            | 1  |
| Part 1. Experimental.....                                                                                                       | 2  |
| Synthesis and characterization of compound A.....                                                                               | 2  |
| 1.1 Synthetic Scheme.....                                                                                                       | 2  |
| 1.2 NMR Characterization.....                                                                                                   | 2  |
| 1.3 Electronic spectra of A <sup>•+</sup> .....                                                                                 | 9  |
| 1.4 Electron paramagnetic resonance spectrum of the radical cation of compound B....                                            | 10 |
| Part 2. Computational .....                                                                                                     | 11 |
| 2.1 Additional figures showing the spin and charge distribution of the cationic species in their ground and excited states..... | 11 |
| 2.2 Calculation details.....                                                                                                    | 14 |
| 2.3. XYZ coordinates of the calculated species.....                                                                             | 15 |

## Part 1. Experimental

### Synthesis and characterization of compound A

#### 1.1 Synthetic Scheme

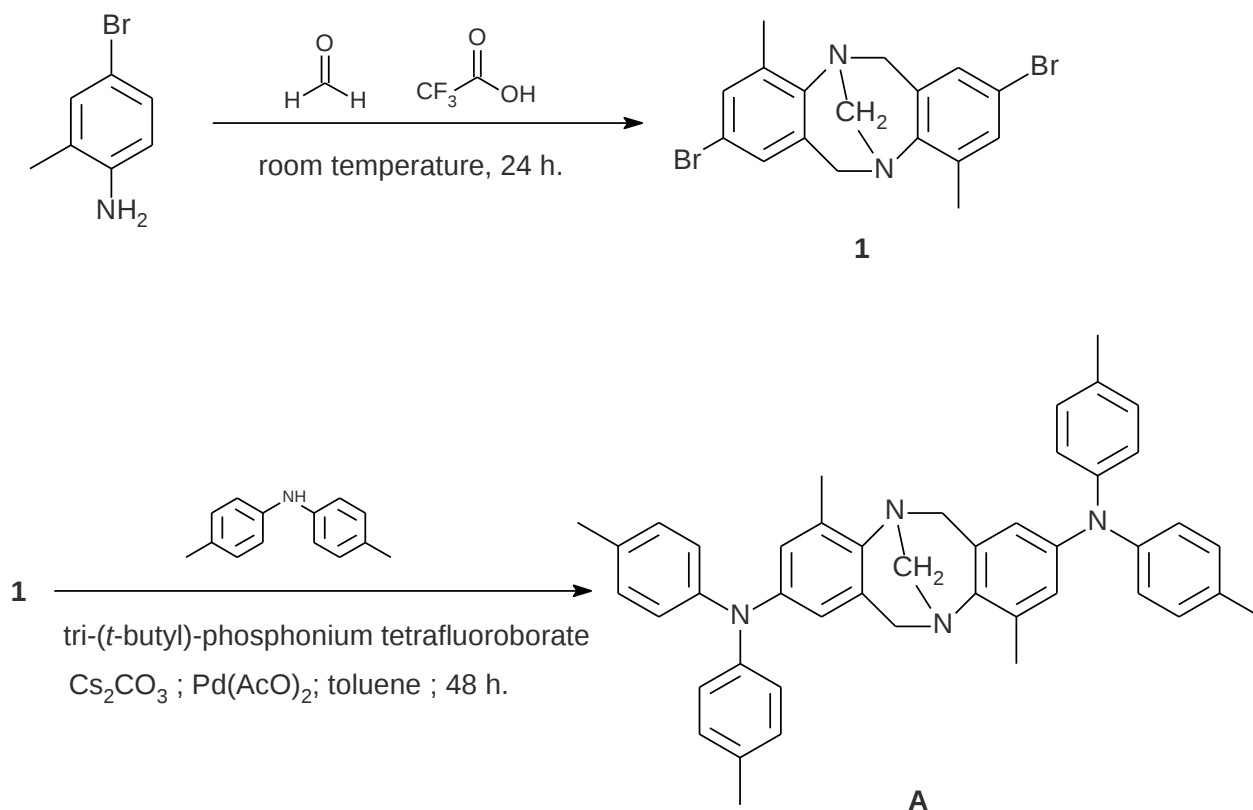

#### 1.2 NMR Characterization.

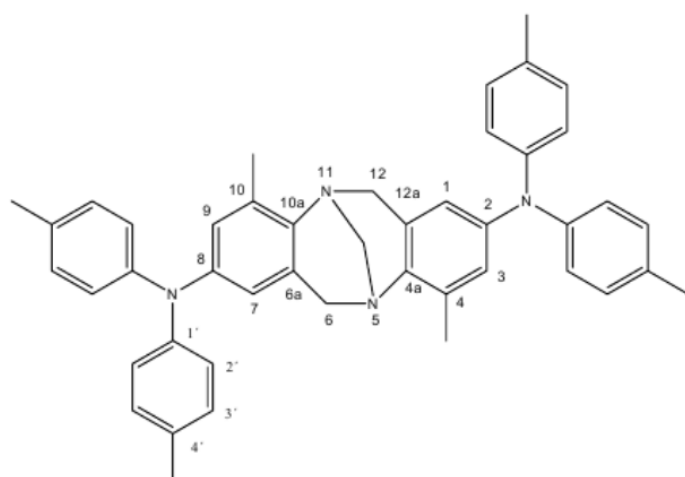

NMR spectra for ( $\pm$ )-4,10-dimethyl-*N,N,N',N'*-tetrakis(4-methylphenyl)-6H,12H-5,11-methanodibenzo[b,f][1,5]diazocine-2,8-diamine.

$^1\text{H NMR}$  (500 MHz,  $\text{CDCl}_3$ )  $\delta$  2.24 (s, 6H,  $\text{C}^{4/10}\text{-CH}_3$ ); 2.30 (s, 12H,  $\text{C}^4\text{-CH}_3$ ); 3.84 (d,  $J=17.0$  Hz, H-6 $\alpha$  and 12 $\alpha$ , 2H); 4.27 (s, H-13, 2H); 4.43 (d,  $J=17.0$  Hz, H-6 $\beta$  and H-12 $\beta$ , 2H); 6.45 (d,  $J=2.5$  Hz, H-1 and H-7, 2H); 6.77 (d,  $J=2.5$  Hz, H-3 and H-9, 2H); 6.93 (d,  $J=8.4$  Hz, H-2',

8H); 7.03 (d,  $J=8.4$  Hz, H-3', 8H).

$^{13}\text{C}$  NMR (125 MHz,  $\text{CDCl}_3$ )  $\delta$  17.0 (2C,  $\text{C}^{4/10}\text{-CH}_3$ ); 20.8 (4C,  $\text{C}_4\text{-CH}_3$ ); 55.0 (2C, C-6 and C-12); 67.7 (1C, C-13); 119.0 (2C, C-1 and C-7); 124.0 (8C, C-2'); 124.2 (2C, C-3 and C-9); 128.8 (2C, C-4 and C-10); 129.7 (8C, C-3'); 131.8 (4C, C-4'); 133.7 (2C, C-6a and C-12a); 140.8 (2C, C-4a and C-10a); 143.7 (2C, C-2 and C-8); 145.6 (4C, C-1').

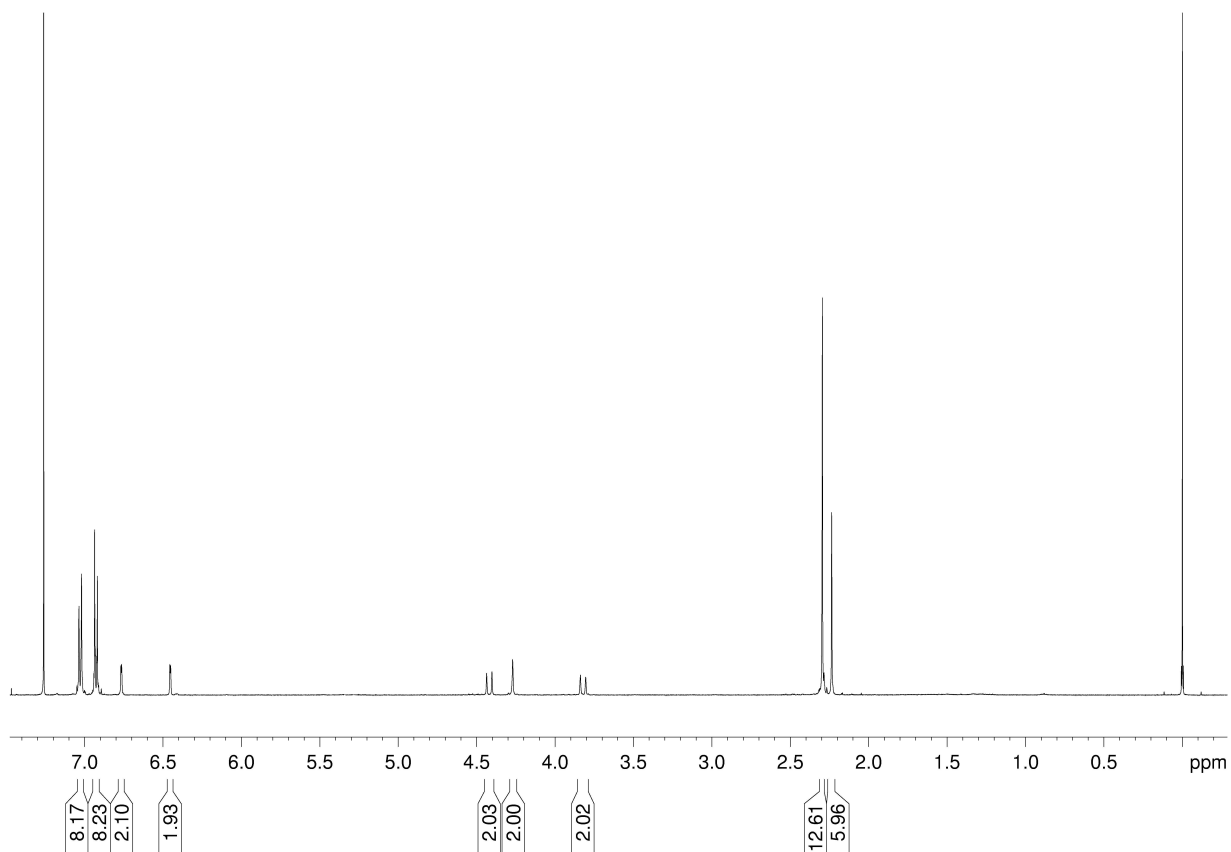

**Figure PSI 1:**  $^1\text{H}$  NMR of compound [A]

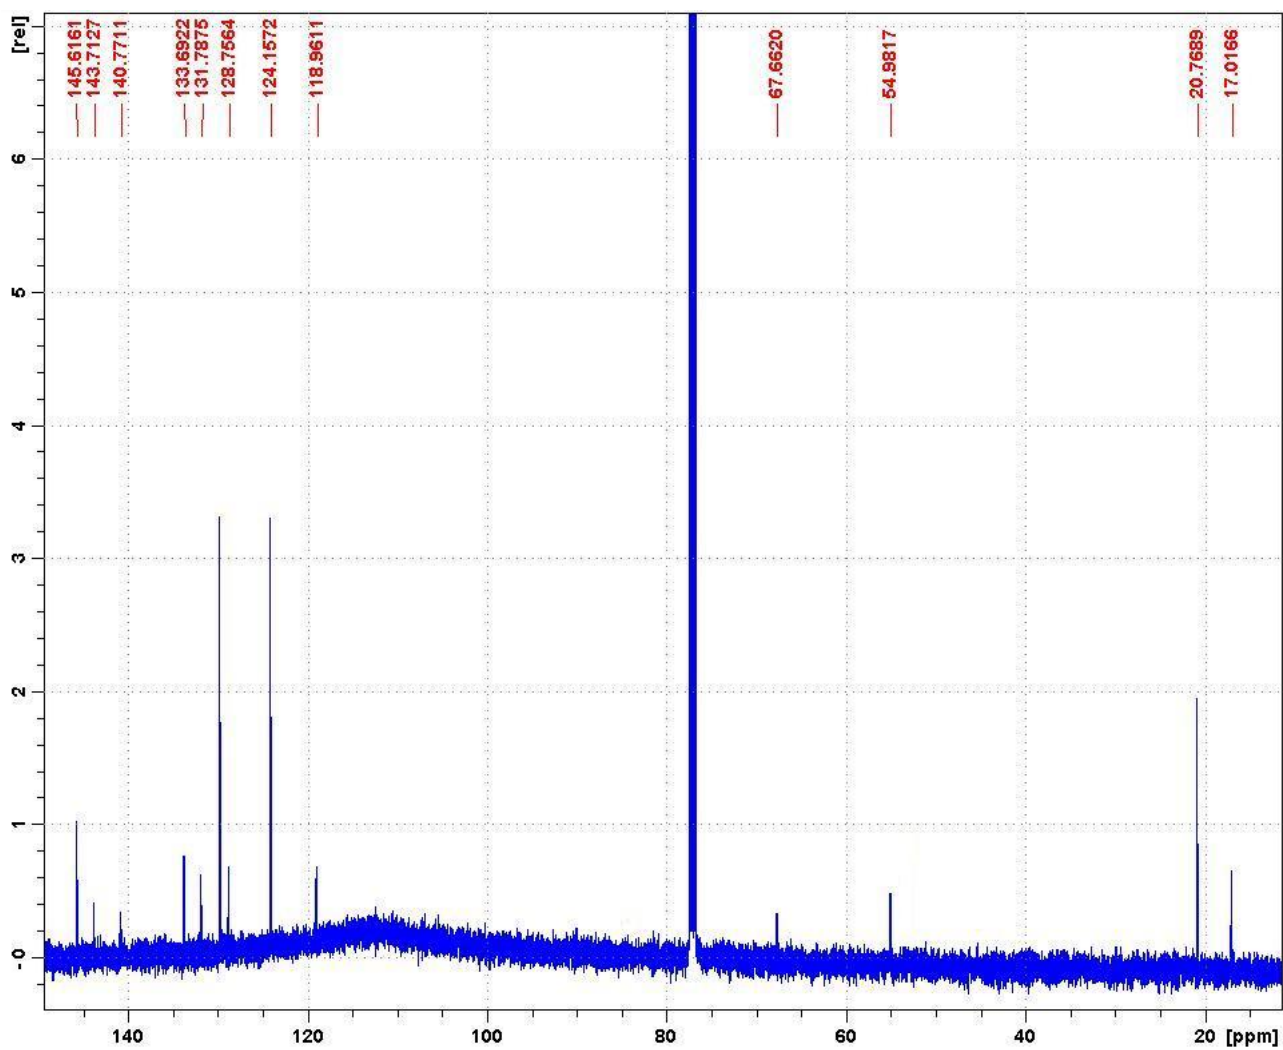

Figure PSI 2:  $^{13}\text{C}$  NMR of compound A

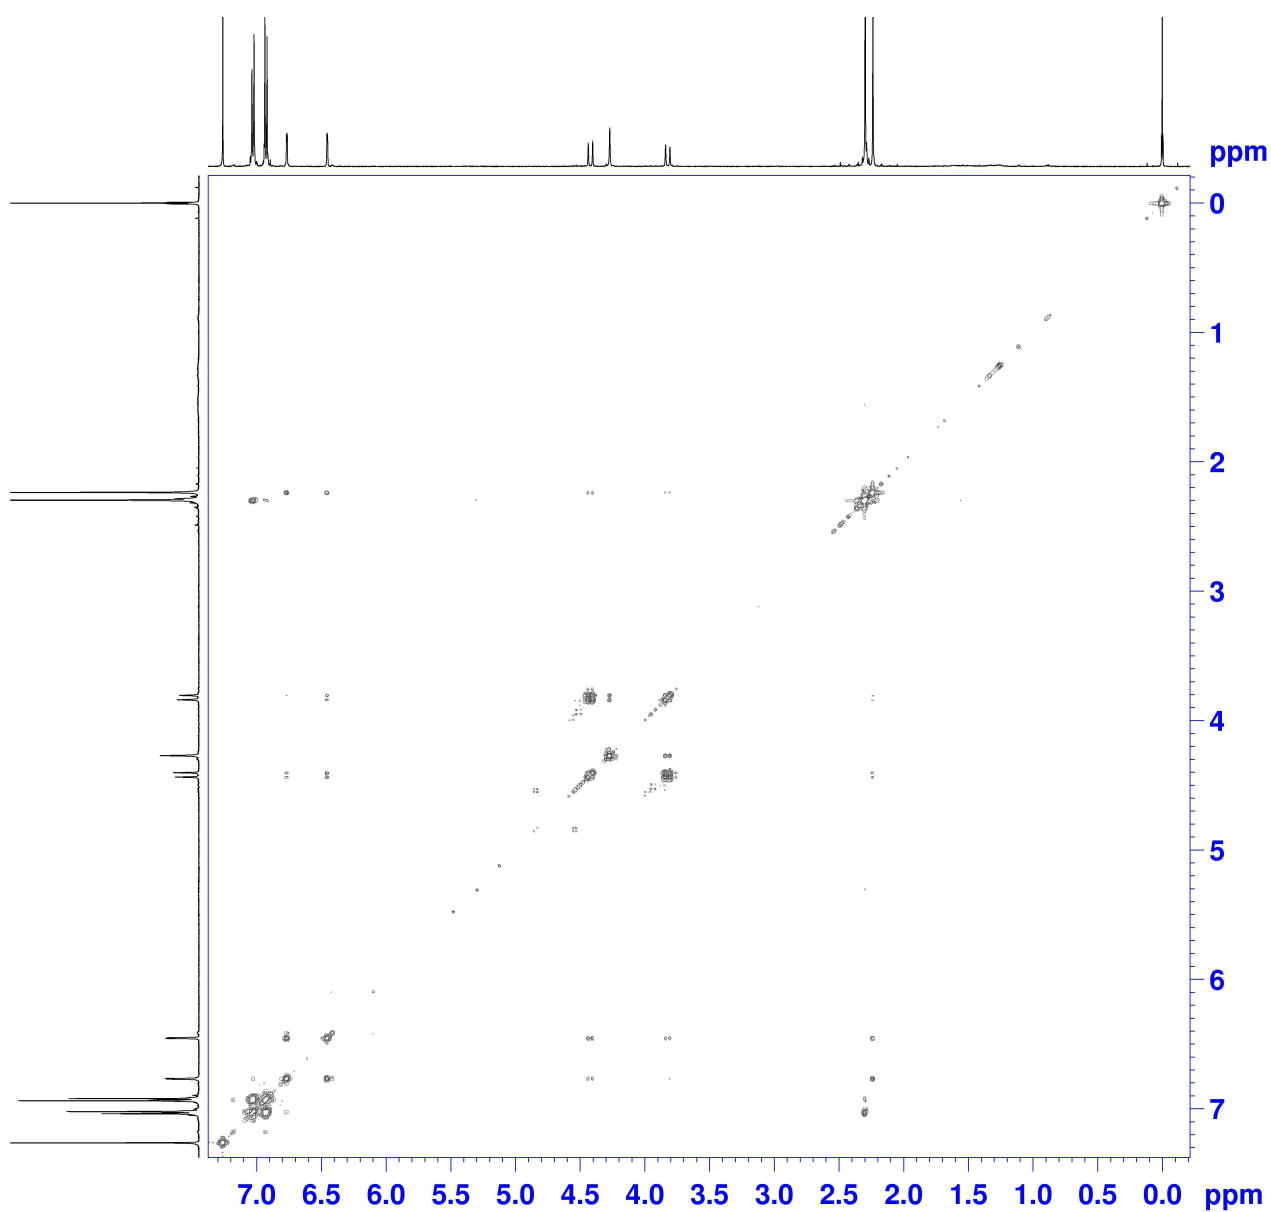

**Figure PSI 3: COSY of compound A**

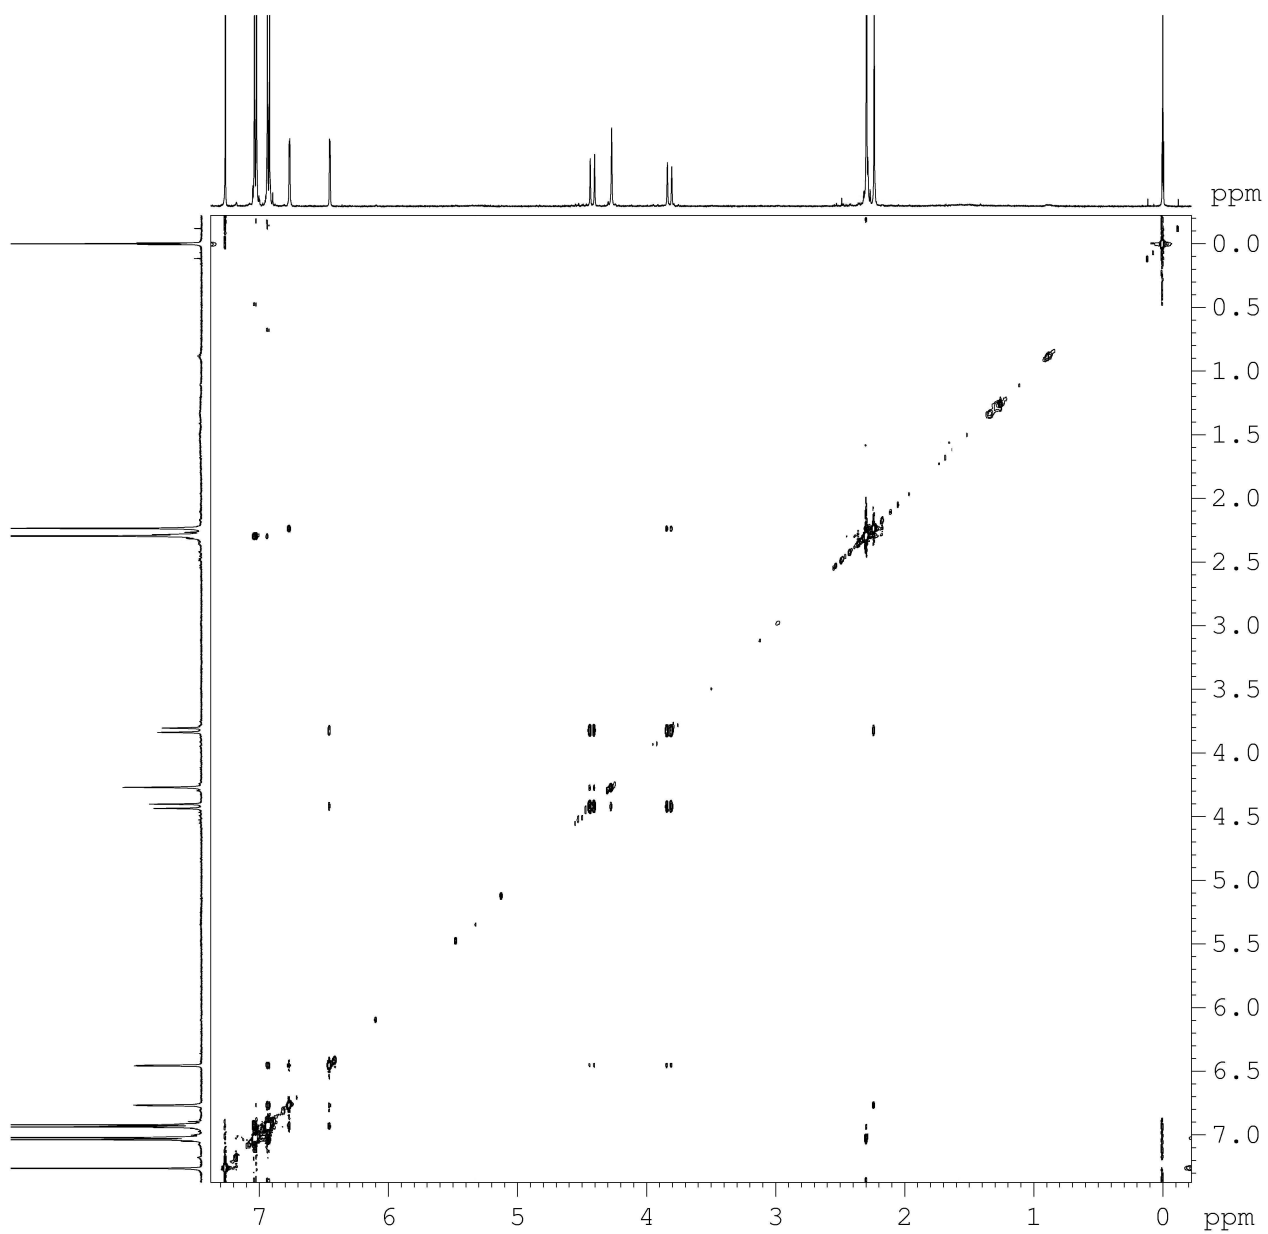

**Figure PSI 4:** NOESY of compound A

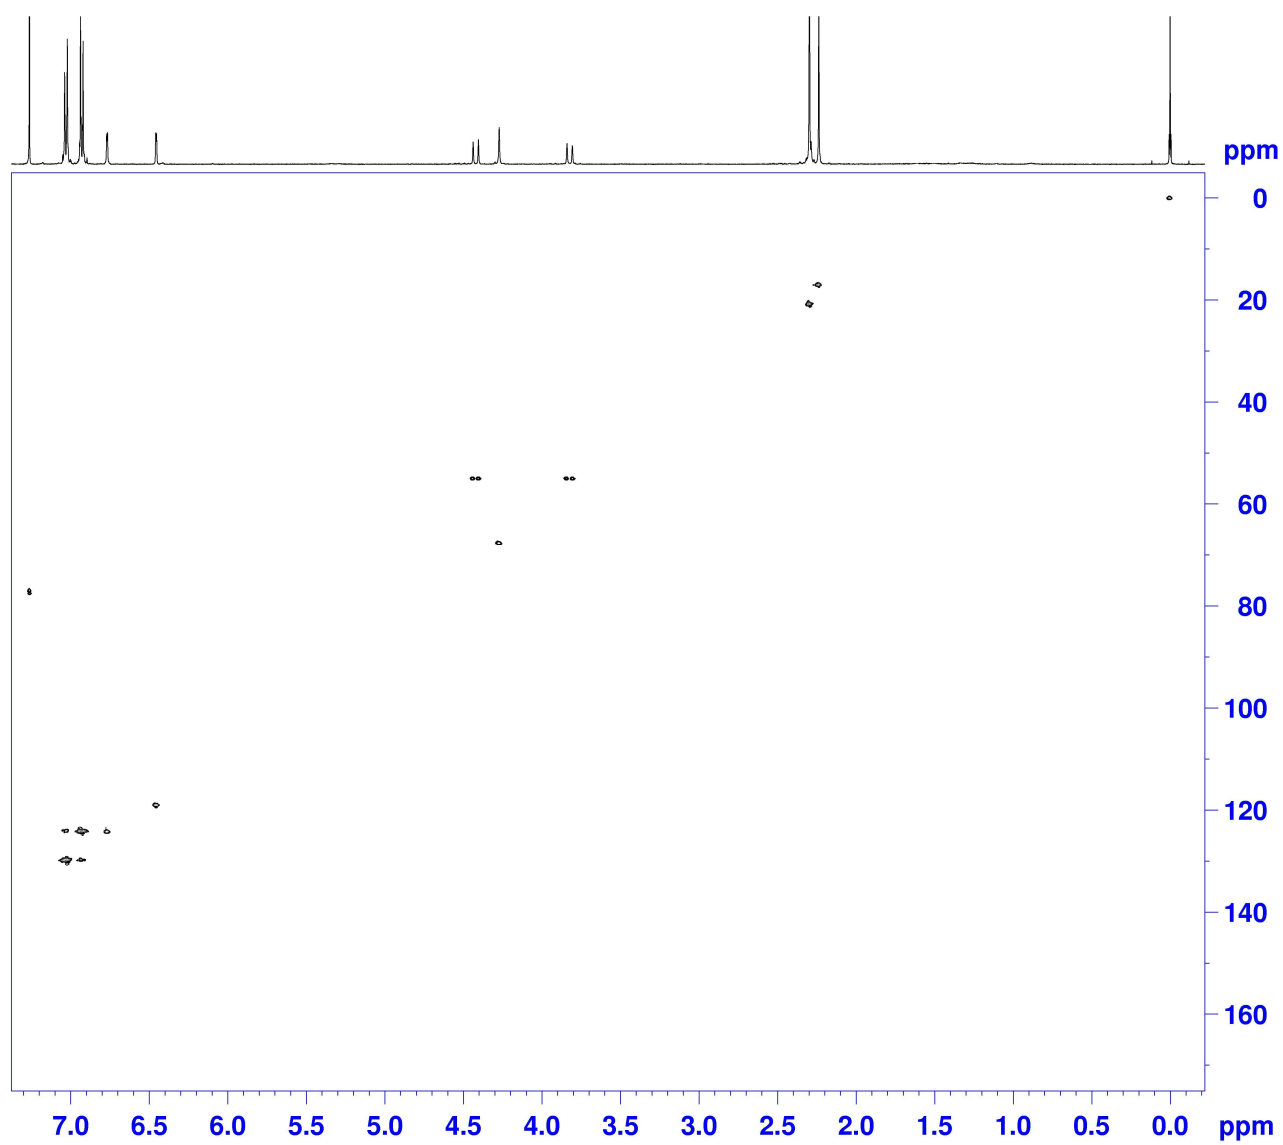

**Figure PSI 5:** HSQC of compound A

### 1.3 Electronic spectra of $A^{\cdot+}$ .

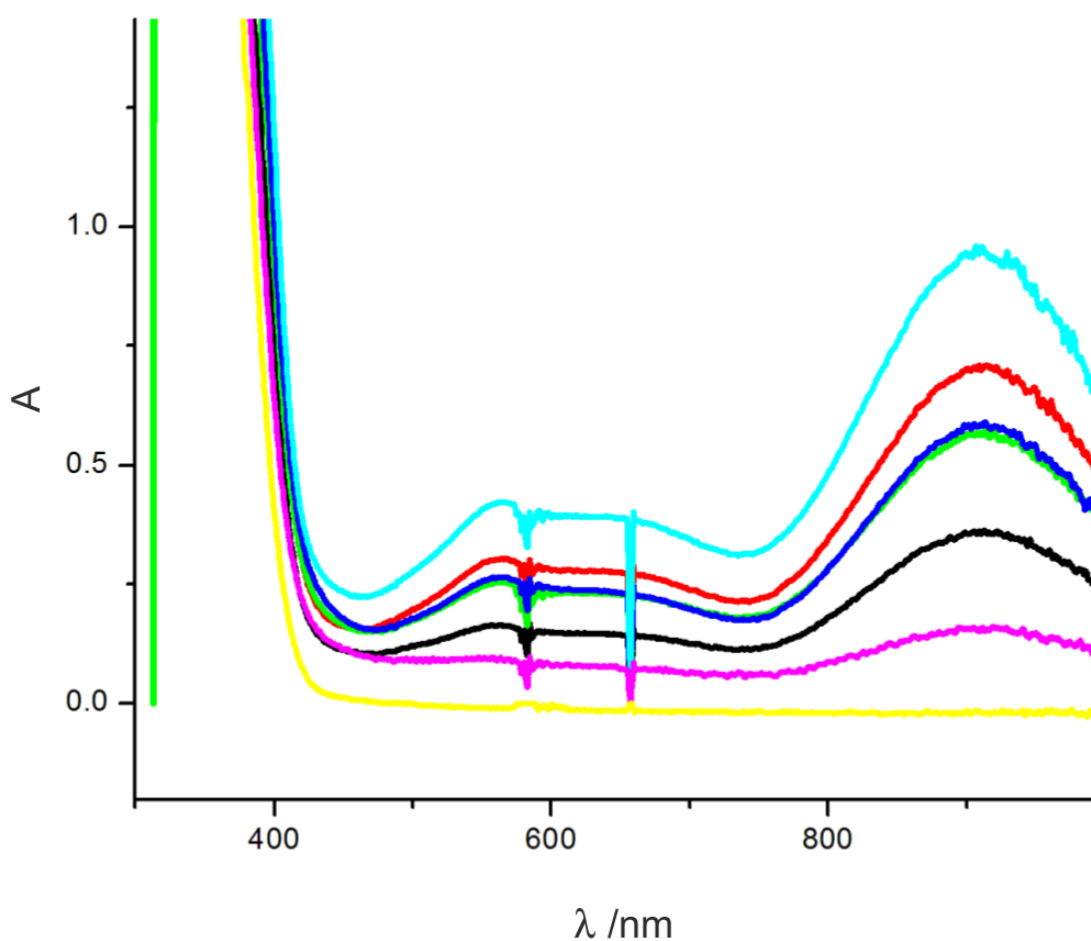

**Figure S1.** Electronic spectra of a solution of  $A/A^{\cdot+}$  at different concentrations of oxidant, from 0 M (yellow) to 0.5 mM (cyan). The neutral species  $A$  has no band at wavelengths longer than 450 nm. (The spikes at 590 and 660 nm are artifacts from the lamp.) The intervalence band is identified as the peak at 910 nm.



#### 1.4 Electron paramagnetic resonance spectrum of the radical cation of compound B.

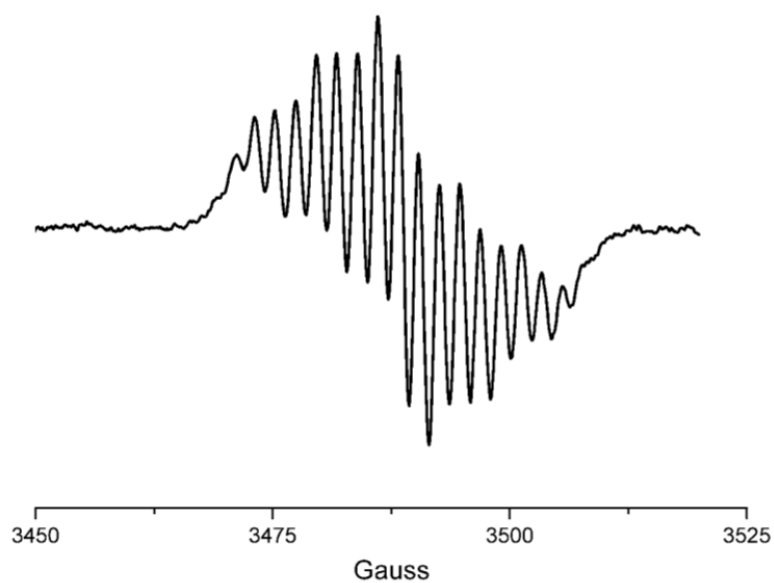

**Figure S2.** High resolution EPR spectrum of the radical cation of **B** at 298 K, similar conditions to **A**<sup>•+</sup> (See main text figure 2a).

## Part 2. Computational

### 2.1 Additional figures showing the spin and charge distribution of the cationic species in their ground and excited states.

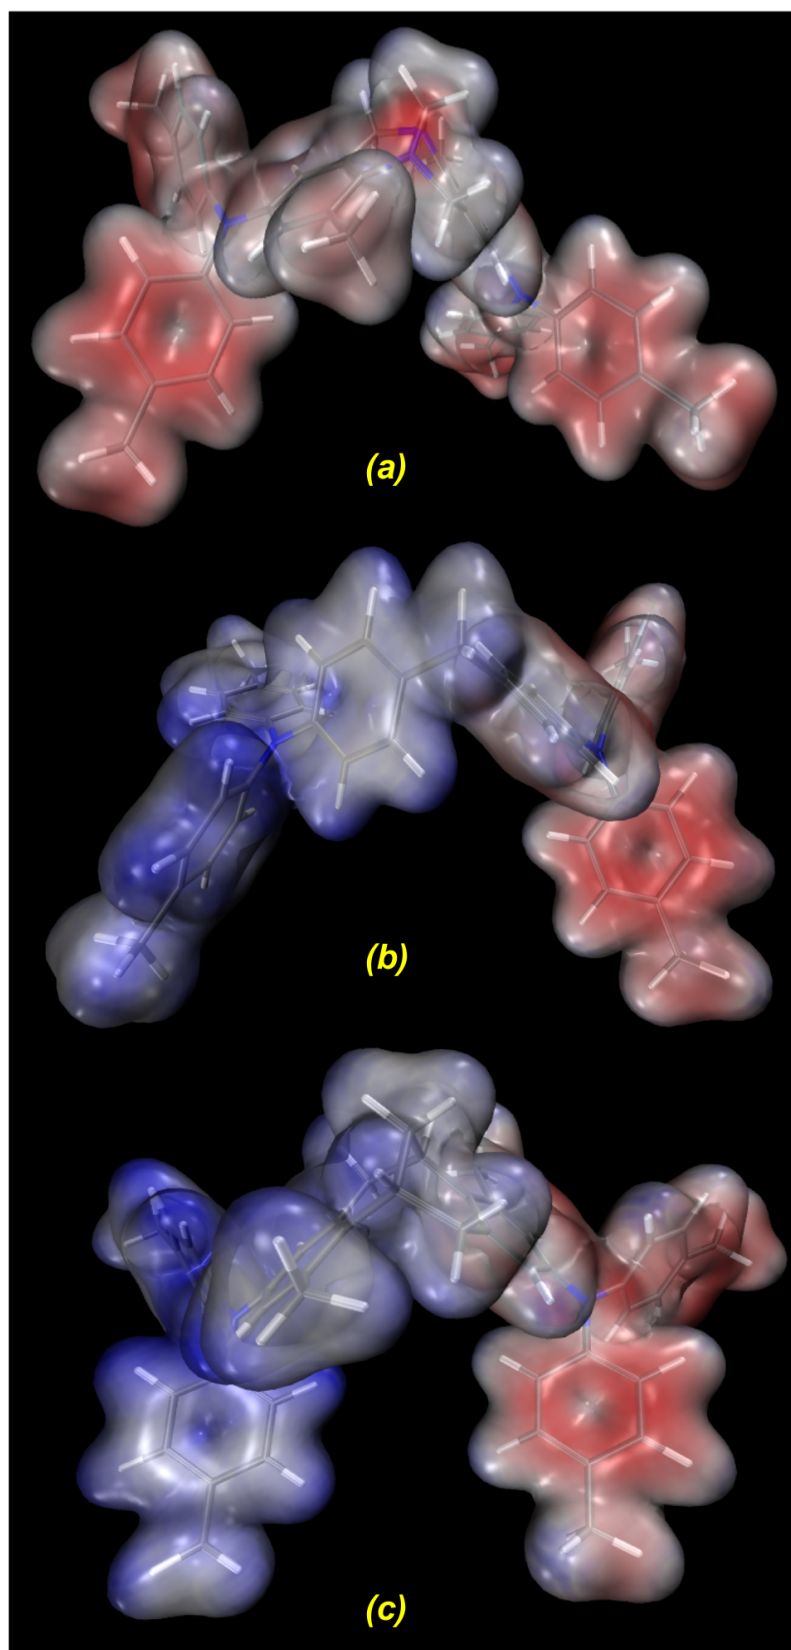

**Figure S3.** Electrostatic potential from red to blue (blue= more positive) showing the charge delocalization in  $A^+$  (a). In sharp contrast, the hole (blue) is localized in  $B^+$  and  $C^+$  (b-c). The potential (from 0.02 to 0.2 a.u.) is plotted over a 0.02 a.u. electron isodensity translucent surface. See also main text figure 3 for spin density distribution. (Molecules orientation is not the same in all cases)

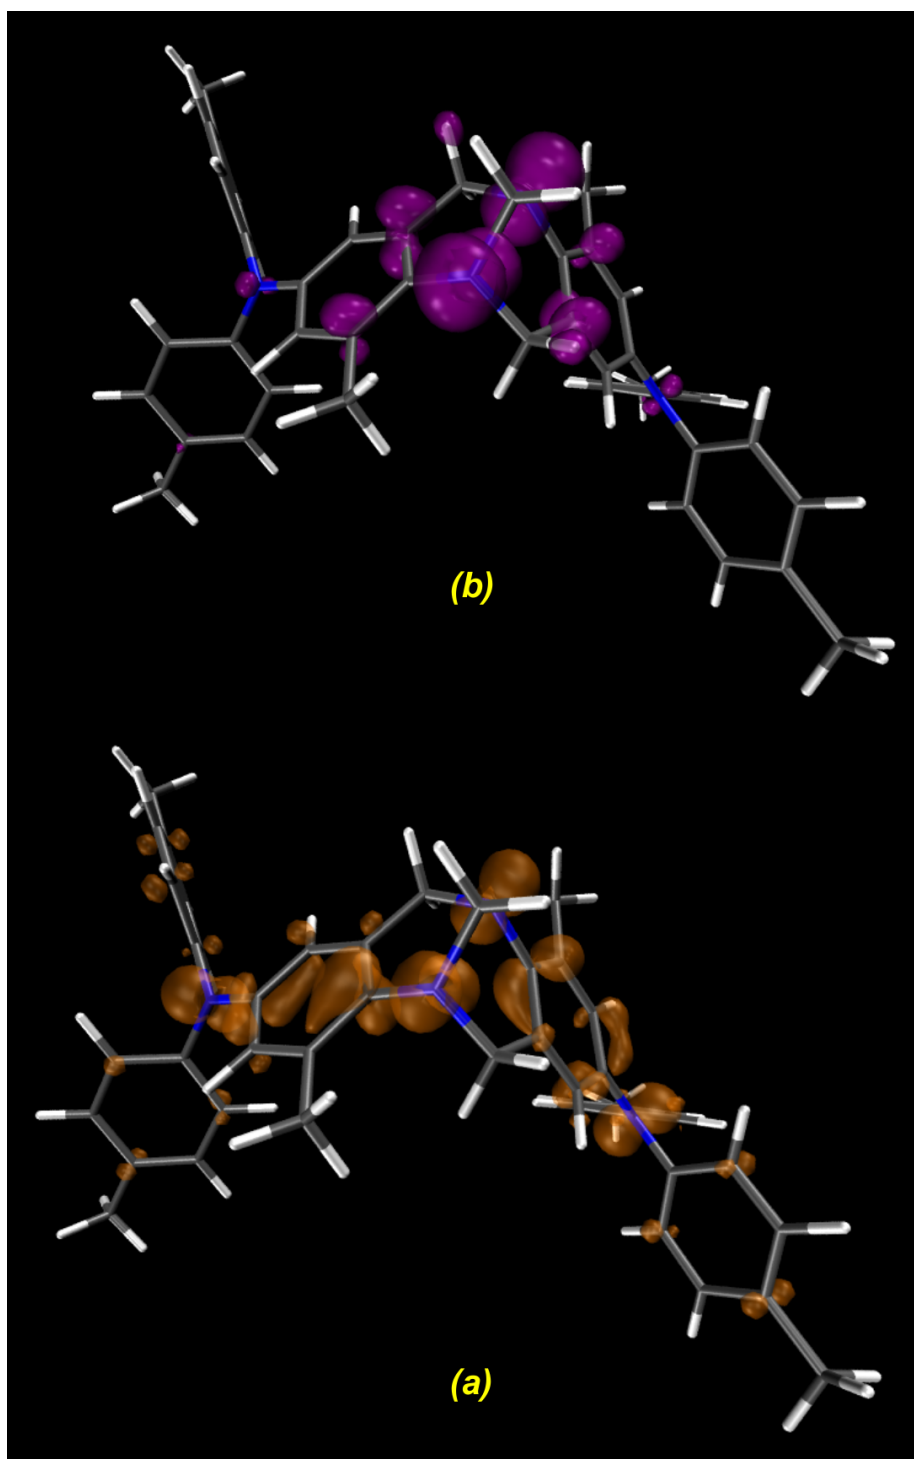

**Figure S4.** Spin density (0.004 a.u.) of the ground state (*a*) and vertical excited doublet (*b*) corresponding to the NIR absorption band (See ESI Figure S1) obtained by simulating  $A^{\bullet+}$  in dichloromethane.

Dichloromethane: Calculated wavelength of the excited state 1080 nm. Transition Dipole: 4.9 D.  
Oscillator Strength : 0.14

(Gas phase: Calculated wavelength of the transition: 1020 nm. Transition Dipole 2.2 D.)

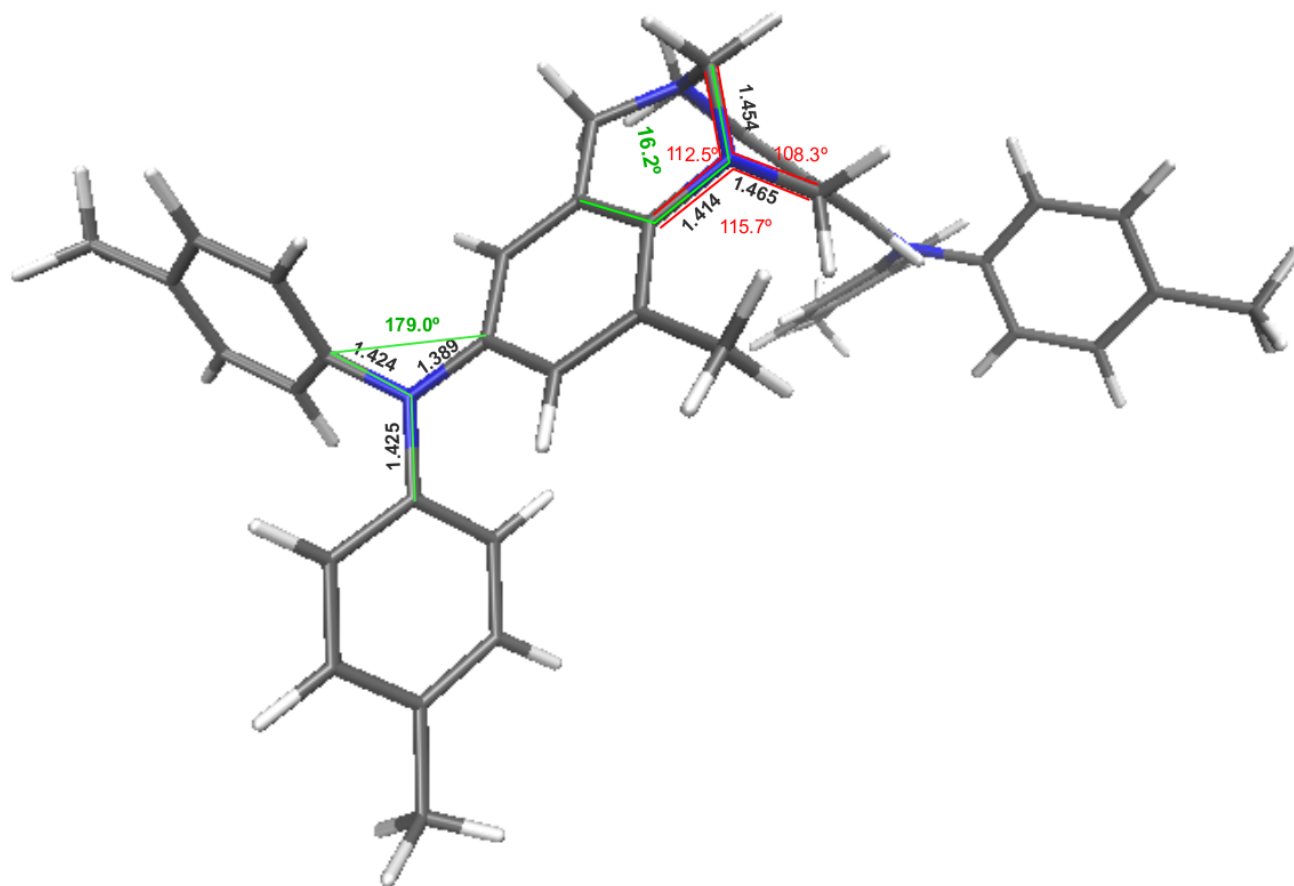

**Figure S5.** Main geometric parameters for the optimized structure of  $A^{\bullet+}$  in dichloromethane: distances (in Å), angles (red) and dihedrals (green).

## 2.2 Calculation details

|              | gas phase  | dichloromethane | ZPE                   | $\langle S^2 \rangle$ |
|--------------|------------|-----------------|-----------------------|-----------------------|
| <b>A</b>     | -1959.2535 | -1959.2690      | 0.7905                | 0.0000                |
| <b>A·+</b>   | -1959.0295 | -1959.0727      | 0.7927                | 0.7502                |
| <b>B</b>     | -1693.8460 |                 | 0.6846 <sup>(a)</sup> | 0.0000                |
| <b>B·+</b>   | -1693.6130 |                 | 0.6853 <sup>(a)</sup> | 0.7514 <sup>(a)</sup> |
| <b>C</b>     | -1927.2002 | -1927.2095      | 0.8144                | 0.0000                |
| <b>C·+</b>   | -1926.9708 | -1927.0203      | 0.8154                | 0.7518                |
| <b>TTA</b>   | -867.1658  | -867.1706       | 0.3646                | 0.0000                |
| <b>TTA·+</b> | -866.9303  | -866.9800       | 0.3657                | 0.7517                |

<sup>(a)</sup>Data obtained from gas-phase calculations

### 2.3. XYZ coordinates of the calculated species.

#### Compound A in methylene chloride

93

|   |          |          |          |
|---|----------|----------|----------|
| C | 5.88318  | 1.92823  | 1.74621  |
| C | 4.66723  | 1.48676  | 1.21284  |
| C | 3.52272  | 2.25341  | 1.44657  |
| C | 3.59658  | 3.42347  | 2.19624  |
| C | 4.80681  | 3.88031  | 2.72079  |
| C | 5.94634  | 3.10773  | 2.47779  |
| N | 4.59637  | 0.28740  | 0.46238  |
| C | 5.61131  | -0.03459 | -0.47231 |
| C | 6.16487  | 0.94837  | -1.29970 |
| C | 7.16275  | 0.62413  | -2.21089 |
| C | 7.63387  | -0.68503 | -2.34515 |
| C | 7.06492  | -1.66063 | -1.52438 |
| C | 6.07798  | -1.34586 | -0.59559 |
| C | 8.72992  | -1.02174 | -3.32400 |
| C | 4.89082  | 5.16724  | 3.50169  |
| C | 3.49074  | -0.58752 | 0.63307  |
| C | 3.05297  | -0.93235 | 1.91466  |
| C | 1.97166  | -1.78497 | 2.11286  |
| C | 1.31137  | -2.31765 | 0.98974  |
| C | 1.74647  | -1.98325 | -0.29942 |
| C | 2.82775  | -1.12162 | -0.46778 |
| C | 1.04992  | -2.55942 | -1.52068 |
| N | -0.22016 | -3.21845 | -1.19297 |
| C | -0.00133 | -4.04404 | -0.01178 |
| N | 0.21809  | -3.22638 | 1.17480  |
| C | -1.31271 | -2.31010 | -1.00195 |
| C | -1.74764 | -1.98388 | 0.28936  |
| C | -1.05152 | -2.56859 | 1.50682  |
| C | -1.97239 | -1.76938 | -2.12157 |
| C | -3.05284 | -0.91699 | -1.91783 |
| C | -3.49045 | -0.58026 | -0.63402 |
| C | -2.82819 | -1.12242 | 0.46333  |
| C | 1.55418  | -2.15437 | 3.51218  |
| C | -1.55527 | -2.13004 | -3.52328 |
| N | -4.59518 | 0.29461  | -0.45759 |
| C | -4.66601 | 1.49734  | -1.20286 |
| C | -3.52248 | 2.26723  | -1.42869 |
| C | -3.59599 | 3.44072  | -2.17355 |
| C | -4.80490 | 3.89706  | -2.70080 |
| C | -5.94405 | 3.12111  | -2.46519 |
| C | -5.88114 | 1.93873  | -1.73878 |
| C | -4.88935 | 5.18487  | -3.48023 |
| C | -5.61155 | -0.03404 | 0.47309  |
| C | -6.17311 | 0.94384  | 1.30026  |
| C | -7.17709 | 0.61328  | 2.20325  |
| C | -7.64307 | -0.69776 | 2.33163  |
| C | -7.07080 | -1.66766 | 1.50563  |
| C | -6.07841 | -1.34681 | 0.58557  |
| C | -8.70452 | -1.05419 | 3.34121  |
| H | -5.34311 | 5.98332  | -2.88114 |
| H | 5.26884  | 5.98637  | 2.87817  |
| H | -3.89778 | 5.52773  | -3.78936 |

|   |          |          |          |
|---|----------|----------|----------|
| H | -5.50230 | 5.06792  | -4.37997 |
| H | 3.90929  | 5.46805  | 3.87933  |
| H | -2.68907 | 4.01777  | -2.33717 |
| H | 5.56805  | 5.07216  | 4.35654  |
| H | 2.68898  | 3.99762  | 2.36626  |
| H | -6.90143 | 3.43964  | -2.87118 |
| H | -5.82463 | 1.96938  | 1.23063  |
| H | 6.90447  | 3.42619  | 2.88198  |
| H | 5.80934  | 1.97136  | -1.22786 |
| H | -2.56918 | 1.94294  | -1.02353 |
| H | -7.59945 | 1.39498  | 2.83031  |
| H | 7.57414  | 1.40797  | -2.84265 |
| H | 2.56850  | 1.92873  | 1.04396  |
| H | -6.77983 | 1.34998  | -1.58413 |
| H | 6.78246  | 1.34186  | 1.58617  |
| H | 8.60154  | -0.48343 | -4.26854 |
| H | -9.43959 | -0.25062 | 3.44890  |
| H | -3.57939 | -0.51292 | -2.77766 |
| H | -8.26738 | -1.23006 | 4.33161  |
| H | 3.15317  | -0.85792 | -1.47091 |
| H | -3.15343 | -0.86503 | 1.46815  |
| H | 9.71487  | -0.74866 | -2.92656 |
| H | 3.58007  | -0.53454 | 2.77707  |
| H | 0.86986  | -1.77049 | -2.25351 |
| H | -2.37745 | -1.96559 | -4.22503 |
| H | 8.75055  | -2.09283 | -3.54493 |
| H | -0.70923 | -1.52321 | -3.86712 |
| H | -0.87087 | -1.78461 | 2.24479  |
| H | -9.23777 | -1.96503 | 3.05308  |
| H | 0.70880  | -1.54887 | 3.85997  |
| H | -5.66165 | -2.11965 | -0.05253 |
| H | 2.37654  | -1.99540 | 4.21498  |
| H | 5.66104  | -2.12428 | 0.03557  |
| H | -7.41646 | -2.69664 | 1.57010  |
| H | 7.40584  | -2.69023 | -1.60180 |
| H | 1.70216  | -3.29807 | -2.00357 |
| H | -1.24404 | -3.17667 | -3.57980 |
| H | -1.70427 | -3.30993 | 1.98486  |
| H | 1.24180  | -3.20100 | 3.56187  |
| H | -0.87297 | -4.68057 | 0.16037  |
| H | 0.86984  | -4.68008 | -0.18812 |

**Radical cation of compound A in methylene chloride**

93

|   |          |          |          |
|---|----------|----------|----------|
| C | -0.23853 | -0.40707 | -0.07138 |
| C | -0.05154 | -0.28656 | 1.30758  |
| C | 1.24433  | -0.29082 | 1.82484  |
| C | 2.33356  | -0.42567 | 0.97142  |
| C | 2.16415  | -0.54483 | -0.40996 |
| C | 0.85842  | -0.53287 | -0.91251 |
| N | -1.17640 | -0.14144 | 2.16993  |
| C | -2.16780 | 0.82241  | 1.83069  |
| C | -1.79085 | 2.10687  | 1.43360  |
| C | -2.75968 | 3.04001  | 1.08742  |
| C | -4.12135 | 2.72569  | 1.12947  |
| C | -4.48226 | 1.43656  | 1.53199  |
| C | -3.52380 | 0.49056  | 1.87283  |
| C | -5.16367 | 3.73449  | 0.72436  |
| C | 3.34651  | -0.65711 | -1.33618 |
| C | -1.29262 | -0.90558 | 3.32389  |

|   |          |          |          |
|---|----------|----------|----------|
| C | -0.72403 | -2.19284 | 3.39536  |
| C | -0.81702 | -2.97127 | 4.53296  |
| C | -1.51777 | -2.46220 | 5.65449  |
| C | -2.06778 | -1.16254 | 5.60242  |
| C | -1.96265 | -0.40536 | 4.45288  |
| C | -2.74097 | -0.56821 | 6.83390  |
| N | -2.50951 | -1.41067 | 8.00936  |
| C | -2.79148 | -2.78943 | 7.64409  |
| N | -1.71491 | -3.27409 | 6.79534  |
| C | -1.24814 | -1.26239 | 8.63098  |
| C | -0.28167 | -2.28730 | 8.53312  |
| C | -0.53243 | -3.49032 | 7.63199  |
| C | -0.96893 | -0.10861 | 9.40487  |
| C | 0.23552  | -0.03177 | 10.07712 |
| C | 1.19797  | -1.05830 | 10.00287 |
| C | 0.91436  | -2.18673 | 9.21550  |
| C | -0.25245 | -4.36718 | 4.52859  |
| C | -1.98867 | 0.98580  | 9.57637  |
| N | 2.40768  | -0.94763 | 10.67620 |
| C | 2.99280  | 0.32705  | 10.92540 |
| C | 3.08828  | 1.27682  | 9.90816  |
| C | 3.66651  | 2.51529  | 10.16423 |
| C | 4.17378  | 2.83380  | 11.42558 |
| C | 4.07824  | 1.86637  | 12.43243 |
| C | 3.49588  | 0.62972  | 12.19338 |
| C | 4.82035  | 4.16677  | 11.69689 |
| C | 3.10722  | -2.10979 | 11.10969 |
| C | 4.47427  | -2.24160 | 10.85740 |
| C | 5.15698  | -3.36777 | 11.29822 |
| C | 4.50254  | -4.39129 | 11.99088 |
| C | 3.13527  | -4.24181 | 12.23921 |
| C | 2.44138  | -3.11664 | 11.81140 |
| C | 5.24516  | -5.62349 | 12.43620 |
| H | 5.90250  | 4.05816  | 11.83243 |
| H | 3.55355  | 0.30251  | -1.82420 |
| H | 4.65635  | 4.86420  | 10.87118 |
| H | 4.42421  | 4.62144  | 12.61061 |
| H | 4.24929  | -0.95485 | -0.79613 |
| H | 3.73315  | 3.24354  | 9.36060  |
| H | 3.16392  | -1.39039 | -2.12773 |
| H | 3.33625  | -0.42618 | 1.39015  |
| H | 4.45915  | 2.08870  | 13.42582 |
| H | 4.99958  | -1.46063 | 10.31706 |
| H | 0.69612  | -0.63232 | -1.98252 |
| H | -0.73939 | 2.37367  | 1.40177  |
| H | 2.71503  | 1.04440  | 8.91587  |
| H | 6.22088  | -3.45466 | 11.09425 |
| H | -2.44968 | 4.03709  | 0.78633  |
| H | 1.39894  | -0.18319 | 2.89380  |
| H | 3.42381  | -0.10418 | 12.98964 |
| H | -1.24415 | -0.40780 | -0.47955 |
| H | -4.83666 | 4.75509  | 0.94318  |
| H | 6.27181  | -5.38610 | 12.72984 |
| H | 0.42767  | 0.82522  | 10.71323 |
| H | 5.29955  | -6.36059 | 11.62617 |
| H | -2.35105 | 0.60793  | 4.44033  |
| H | 1.66695  | -2.95934 | 9.09567  |
| H | -5.36307 | 3.67869  | -0.35243 |
| H | -0.23606 | -2.60207 | 2.51757  |
| H | -2.35858 | 0.43589  | 7.01523  |
| H | -1.82189 | 1.52052  | 10.51447 |



|   |          |          |          |
|---|----------|----------|----------|
| H | -6.11099 | 3.55927  | 1.24200  |
| H | -1.92861 | 1.72450  | 8.76892  |
| H | 0.33961  | -3.66895 | 7.00364  |
| H | 4.74862  | -6.10363 | 13.28403 |
| H | 0.76149  | -4.39382 | 4.94399  |
| H | 1.38380  | -3.01131 | 12.03156 |
| H | -0.19207 | -4.75249 | 3.50794  |
| H | -3.82512 | -0.50999 | 2.16630  |
| H | 2.60379  | -5.01272 | 12.79066 |
| H | -5.53296 | 1.16158  | 1.56909  |
| H | -3.82153 | -0.48480 | 6.67217  |
| H | -3.00440 | 0.58209  | 9.57927  |
| H | -0.69249 | -4.39050 | 8.23594  |
| H | -0.87085 | -5.04515 | 5.12235  |
| H | -2.85090 | -3.41465 | 8.53657  |
| H | -3.74289 | -2.82952 | 7.11111  |

**Compound A in gas-phase**

93

|   |          |          |          |
|---|----------|----------|----------|
| C | -0.28837 | -0.39378 | -0.13660 |
| C | -0.07402 | -0.29297 | 1.24100  |
| C | 1.23091  | -0.32397 | 1.73396  |
| C | 2.30130  | -0.46647 | 0.85889  |
| C | 2.10471  | -0.56986 | -0.51938 |
| C | 0.78983  | -0.52935 | -0.99740 |
| N | -1.18012 | -0.13851 | 2.12409  |
| C | -2.18195 | 0.81712  | 1.79342  |
| C | -1.81774 | 2.09742  | 1.37061  |
| C | -2.79695 | 3.02139  | 1.03359  |
| C | -4.15635 | 2.70242  | 1.10678  |
| C | -4.50381 | 1.41723  | 1.53240  |
| C | -3.53559 | 0.48022  | 1.86726  |
| C | -5.20948 | 3.70107  | 0.70731  |
| C | 3.26359  | -0.70873 | -1.47017 |
| C | -1.27682 | -0.89419 | 3.28637  |
| C | -0.72052 | -2.18668 | 3.35484  |
| C | -0.80655 | -2.95983 | 4.49720  |
| C | -1.48042 | -2.43753 | 5.62766  |
| C | -2.01752 | -1.13425 | 5.57950  |
| C | -1.92218 | -0.38257 | 4.42400  |
| C | -2.67964 | -0.53422 | 6.81384  |
| N | -2.46516 | -1.37483 | 7.99346  |
| C | -2.74071 | -2.75359 | 7.62445  |
| N | -1.66901 | -3.24687 | 6.77516  |
| C | -1.20445 | -1.23122 | 8.62374  |
| C | -0.23428 | -2.24923 | 8.51582  |
| C | -0.48113 | -3.44735 | 7.60762  |
| C | -0.93768 | -0.09058 | 9.41911  |
| C | 0.26313  | -0.01637 | 10.09927 |
| C | 1.23020  | -1.03752 | 10.01676 |
| C | 0.95742  | -2.15334 | 9.20866  |
| C | -0.26499 | -4.36484 | 4.49242  |
| C | -1.96968 | 0.99042  | 9.60250  |
| N | 2.43115  | -0.93822 | 10.70881 |
| C | 3.01431  | 0.33037  | 10.98635 |
| C | 3.10731  | 1.30432  | 9.99118  |
| C | 3.68452  | 2.53598  | 10.27554 |
| C | 4.19177  | 2.82600  | 11.54367 |
| C | 4.09792  | 1.83514  | 12.52744 |
| C | 3.51908  | 0.60376  | 12.26073 |

|   |          |          |          |
|---|----------|----------|----------|
| C | 4.83791  | 4.15160  | 11.84600 |
| C | 3.11456  | -2.10791 | 11.14686 |
| C | 4.48706  | -2.24391 | 10.92208 |
| C | 5.15254  | -3.37795 | 11.36338 |
| C | 4.47895  | -4.40358 | 12.03595 |
| C | 3.10756  | -4.25163 | 12.25269 |
| C | 2.42828  | -3.11891 | 11.82150 |
| C | 5.22009  | -5.61789 | 12.52820 |
| H | 5.92198  | 4.04205  | 11.96377 |
| H | 3.34133  | 0.16495  | -2.12663 |
| H | 4.66266  | 4.87441  | 11.04497 |
| H | 4.45241  | 4.57871  | 12.77721 |
| H | 4.21103  | -0.80864 | -0.93443 |
| H | 3.75242  | 3.28272  | 9.48923  |
| H | 3.14577  | -1.58729 | -2.11306 |
| H | 3.31200  | -0.48398 | 1.25714  |
| H | 4.47865  | 2.03553  | 13.52543 |
| H | 5.02605  | -1.46020 | 10.39943 |
| H | 0.60703  | -0.61278 | -2.06546 |
| H | -0.76781 | 2.36542  | 1.31062  |
| H | 2.73534  | 1.09294  | 8.99360  |
| H | 6.21904  | -3.47208 | 11.17670 |
| H | -2.49817 | 4.01551  | 0.71230  |
| H | 1.40657  | -0.22664 | 2.80071  |
| H | 3.44963  | -0.14912 | 13.03922 |
| H | -1.30110 | -0.37004 | -0.52577 |
| H | -4.89730 | 4.72425  | 0.93513  |
| H | 5.84807  | -5.37010 | 13.39157 |
| H | 0.44780  | 0.83016  | 10.75168 |
| H | 5.87903  | -6.02347 | 11.75401 |
| H | -2.30737 | 0.63234  | 4.40719  |
| H | 1.71317  | -2.92388 | 9.09139  |
| H | -5.40454 | 3.65141  | -0.37046 |
| H | -0.25258 | -2.60405 | 2.46986  |
| H | -2.28265 | 0.46469  | 6.99789  |
| H | -1.81081 | 1.51886  | 10.54555 |
| H | -6.15640 | 3.51195  | 1.22034  |
| H | -1.92192 | 1.73932  | 8.80316  |
| H | 0.38867  | -3.61556 | 6.97166  |
| H | 4.53203  | -6.40954 | 12.83576 |
| H | 0.74872  | -4.41189 | 4.90744  |
| H | 1.36625  | -3.01068 | 12.01818 |
| H | -0.21126 | -4.75373 | 3.47275  |
| H | -3.82576 | -0.51925 | 2.17559  |
| H | 2.56095  | -5.02693 | 12.78237 |
| H | -5.55248 | 1.13834  | 1.58951  |
| H | -3.75940 | -0.43122 | 6.65255  |
| H | -2.97940 | 0.57177  | 9.60296  |
| H | -0.62665 | -4.35388 | 8.20720  |
| H | -0.89675 | -5.03016 | 5.08652  |
| H | -2.80308 | -3.37779 | 8.51834  |
| H | -3.69319 | -2.79652 | 7.09202  |

**Radical cation of compound A in gas-phase**

93

|   |          |          |          |
|---|----------|----------|----------|
| C | -0.28837 | -0.39378 | -0.13660 |
| C | -0.07402 | -0.29297 | 1.24100  |
| C | 1.23091  | -0.32397 | 1.73396  |
| C | 2.30130  | -0.46647 | 0.85889  |
| C | 2.10471  | -0.56986 | -0.51938 |

|   |          |          |          |
|---|----------|----------|----------|
| C | 0.78983  | -0.52935 | -0.99740 |
| N | -1.18012 | -0.13851 | 2.12409  |
| C | -2.18195 | 0.81712  | 1.79342  |
| C | -1.81774 | 2.09742  | 1.37061  |
| C | -2.79695 | 3.02139  | 1.03359  |
| C | -4.15635 | 2.70242  | 1.10678  |
| C | -4.50381 | 1.41723  | 1.53240  |
| C | -3.53559 | 0.48022  | 1.86726  |
| C | -5.20948 | 3.70107  | 0.70731  |
| C | 3.26359  | -0.70873 | -1.47017 |
| C | -1.27682 | -0.89419 | 3.28637  |
| C | -0.72052 | -2.18668 | 3.35484  |
| C | -0.80655 | -2.95983 | 4.49720  |
| C | -1.48042 | -2.43753 | 5.62766  |
| C | -2.01752 | -1.13425 | 5.57950  |
| C | -1.92218 | -0.38257 | 4.42400  |
| C | -2.67964 | -0.53422 | 6.81384  |
| N | -2.46516 | -1.37483 | 7.99346  |
| C | -2.74071 | -2.75359 | 7.62445  |
| N | -1.66901 | -3.24687 | 6.77516  |
| C | -1.20445 | -1.23122 | 8.62374  |
| C | -0.23428 | -2.24923 | 8.51582  |
| C | -0.48113 | -3.44735 | 7.60762  |
| C | -0.93768 | -0.09058 | 9.41911  |
| C | 0.26313  | -0.01637 | 10.09927 |
| C | 1.23020  | -1.03752 | 10.01676 |
| C | 0.95742  | -2.15334 | 9.20866  |
| C | -0.26499 | -4.36484 | 4.49242  |
| C | -1.96968 | 0.99042  | 9.60250  |
| N | 2.43115  | -0.93822 | 10.70881 |
| C | 3.01431  | 0.33037  | 10.98635 |
| C | 3.10731  | 1.30432  | 9.99118  |
| C | 3.68452  | 2.53598  | 10.27554 |
| C | 4.19177  | 2.82600  | 11.54367 |
| C | 4.09792  | 1.83514  | 12.52744 |
| C | 3.51908  | 0.60376  | 12.26073 |
| C | 4.83791  | 4.15160  | 11.84600 |
| C | 3.11456  | -2.10791 | 11.14686 |
| C | 4.48706  | -2.24391 | 10.92208 |
| C | 5.15254  | -3.37795 | 11.36338 |
| C | 4.47895  | -4.40358 | 12.03595 |
| C | 3.10756  | -4.25163 | 12.25269 |
| C | 2.42828  | -3.11891 | 11.82150 |
| C | 5.22009  | -5.61789 | 12.52820 |
| H | 5.92198  | 4.04205  | 11.96377 |
| H | 3.34133  | 0.16495  | -2.12663 |
| H | 4.66266  | 4.87441  | 11.04497 |
| H | 4.45241  | 4.57871  | 12.77721 |
| H | 4.21103  | -0.80864 | -0.93443 |
| H | 3.75242  | 3.28272  | 9.48923  |
| H | 3.14577  | -1.58729 | -2.11306 |
| H | 3.31200  | -0.48398 | 1.25714  |
| H | 4.47865  | 2.03553  | 13.52543 |
| H | 5.02605  | -1.46020 | 10.39943 |
| H | 0.60703  | -0.61278 | -2.06546 |
| H | -0.76781 | 2.36542  | 1.31062  |
| H | 2.73534  | 1.09294  | 8.99360  |
| H | 6.21904  | -3.47208 | 11.17670 |
| H | -2.49817 | 4.01551  | 0.71230  |
| H | 1.40657  | -0.22664 | 2.80071  |
| H | 3.44963  | -0.14912 | 13.03922 |

|   |          |          |          |
|---|----------|----------|----------|
| H | -1.30110 | -0.37004 | -0.52577 |
| H | -4.89730 | 4.72425  | 0.93513  |
| H | 5.84807  | -5.37010 | 13.39157 |
| H | 0.44780  | 0.83016  | 10.75168 |
| H | 5.87903  | -6.02347 | 11.75401 |
| H | -2.30737 | 0.63234  | 4.40719  |
| H | 1.71317  | -2.92388 | 9.09139  |
| H | -5.40454 | 3.65141  | -0.37046 |
| H | -0.25258 | -2.60405 | 2.46986  |
| H | -2.28265 | 0.46469  | 6.99789  |
| H | -1.81081 | 1.51886  | 10.54555 |
| H | -6.15640 | 3.51195  | 1.22034  |
| H | -1.92192 | 1.73932  | 8.80316  |
| H | 0.38867  | -3.61556 | 6.97166  |
| H | 4.53203  | -6.40954 | 12.83576 |
| H | 0.74872  | -4.41189 | 4.90744  |
| H | 1.36625  | -3.01068 | 12.01818 |
| H | -0.21126 | -4.75373 | 3.47275  |
| H | -3.82576 | -0.51925 | 2.17559  |
| H | 2.56095  | -5.02693 | 12.78237 |
| H | -5.55248 | 1.13834  | 1.58951  |
| H | -3.75940 | -0.43122 | 6.65255  |
| H | -2.97940 | 0.57177  | 9.60296  |
| H | -0.62665 | -4.35388 | 8.20720  |
| H | -0.89675 | -5.03016 | 5.08652  |
| H | -2.80308 | -3.37779 | 8.51834  |
| H | -3.69319 | -2.79652 | 7.09202  |

**Compound B in gas-phase**

81

|   |          |          |          |
|---|----------|----------|----------|
| C | 0.40629  | 0.15778  | 0.59470  |
| C | -0.05291 | 0.47781  | 1.87355  |
| C | 0.79615  | 1.18783  | 2.72861  |
| C | 2.06202  | 1.57052  | 2.30579  |
| C | 2.53490  | 1.24884  | 1.03073  |
| C | 1.68367  | 0.53140  | 0.19040  |
| N | -1.34912 | 0.09094  | 2.29766  |
| C | -1.84028 | -1.20165 | 1.98940  |
| C | -1.01536 | -2.32303 | 2.08751  |
| C | -1.50419 | -3.58686 | 1.77011  |
| C | -2.82406 | -3.77720 | 1.36519  |
| C | -3.64407 | -2.64889 | 1.27610  |
| C | -3.16516 | -1.38174 | 1.57463  |
| C | -3.35831 | -5.15796 | 1.04141  |
| C | -3.91148 | -5.29968 | -0.36186 |
| C | -5.24082 | -5.65285 | -0.58628 |
| C | -5.74756 | -5.79911 | -1.87421 |
| C | -4.93091 | -5.57707 | -2.98407 |
| C | -3.59647 | -5.21232 | -2.76852 |
| C | -3.10028 | -5.08465 | -1.47949 |
| N | -5.43852 | -5.71524 | -4.29901 |
| C | -4.65158 | -6.33526 | -5.30186 |
| C | -3.91443 | -7.49022 | -5.01917 |
| C | -3.14165 | -8.09077 | -6.00339 |
| C | -3.08681 | -7.57972 | -7.30326 |
| C | -3.83342 | -6.43411 | -7.57635 |
| C | -4.59775 | -5.81162 | -6.59446 |
| C | -2.24748 | -8.24660 | -8.36320 |
| C | 3.90909  | 1.67661  | 0.58210  |
| C | -6.73387 | -5.23309 | -4.61547 |

|   |           |          |          |
|---|-----------|----------|----------|
| C | -7.60213  | -5.99002 | -5.40897 |
| C | -8.86561  | -5.51013 | -5.72507 |
| C | -9.31772  | -4.27496 | -5.25193 |
| C | -8.44698  | -3.53288 | -4.45456 |
| C | -7.17127  | -3.99401 | -4.14525 |
| C | -10.69769 | -3.77305 | -5.59303 |
| C | -2.15186  | 0.99776  | 3.03421  |
| C | -2.21669  | 2.34784  | 2.67487  |
| C | -2.99895  | 3.23363  | 3.40349  |
| C | -3.75492  | 2.80997  | 4.49985  |
| C | -3.69201  | 1.45924  | 4.84184  |
| C | -2.89805  | 0.56468  | 4.13171  |
| C | -4.59153  | 3.78482  | 5.28866  |
| H | -6.78432  | -6.08440 | -2.02088 |
| H | -5.89736  | -5.83324 | 0.26175  |
| H | -2.06284  | -4.79134 | -1.33844 |
| H | -2.94926  | -5.03039 | -3.62051 |
| H | -9.52079  | -6.11761 | -6.34547 |
| H | -7.27815  | -6.95694 | -5.78066 |
| H | -6.50900  | -3.39092 | -3.53224 |
| H | -8.76372  | -2.56468 | -4.07460 |
| H | -10.87396 | -2.77894 | -5.17207 |
| H | -10.84279 | -3.70612 | -6.67706 |
| H | -11.47387 | -4.44128 | -5.20268 |
| H | -3.94930  | -7.91424 | -4.02064 |
| H | -3.81109  | -6.00713 | -8.57603 |
| H | -5.16148  | -4.91509 | -6.83195 |
| H | -2.86011  | -0.47953 | 4.42526  |
| H | -4.26680  | 1.09496  | 5.68988  |
| H | -3.03246  | 4.27830  | 3.10241  |
| H | -1.64871  | 2.69991  | 1.81960  |
| H | -5.28321  | 3.26480  | 5.95786  |
| H | -3.96502  | 4.43980  | 5.90582  |
| H | -5.18353  | 4.42896  | 4.62981  |
| H | -0.84108  | -4.44468 | 1.85485  |
| H | 0.01434   | -2.20362 | 2.40886  |
| H | -3.81840  | -0.51932 | 1.48798  |
| H | -4.67386  | -2.76113 | 0.94598  |
| H | 0.45721   | 1.43945  | 3.72854  |
| H | 2.01842   | 0.26618  | -0.80950 |
| H | -0.23951  | -0.39099 | -0.08337 |
| H | -2.57745  | -8.98751 | -5.75696 |
| H | -2.35601  | -7.74485 | -9.32911 |
| H | -2.53363  | -9.29565 | -8.49891 |
| H | -1.18382  | -8.23222 | -8.09920 |
| H | 2.70277   | 2.12132  | 2.99075  |
| H | 4.18805   | 1.19342  | -0.35878 |
| H | 4.67074   | 1.42271  | 1.32723  |
| H | 3.95805   | 2.76050  | 0.42424  |
| H | -4.14649  | -5.42162 | 1.75707  |
| H | -2.55469  | -5.88857 | 1.19341  |

**Radical cation of compound B in gas-phase**

81

|   |          |          |         |
|---|----------|----------|---------|
| C | 0.39896  | -0.01605 | 0.60817 |
| C | -0.08230 | 0.38821  | 1.86091 |
| C | 0.72672  | 1.17293  | 2.69815 |
| C | 1.99501  | 1.53198  | 2.28243 |
| C | 2.49266  | 1.13870  | 1.03070 |
| C | 1.66943  | 0.36323  | 0.20660 |

|   |           |          |          |
|---|-----------|----------|----------|
| N | -1.37692  | 0.01227  | 2.27645  |
| C | -1.85696  | -1.27562 | 2.00235  |
| C | -0.98910  | -2.37961 | 2.05866  |
| C | -1.47395  | -3.64750 | 1.79187  |
| C | -2.81572  | -3.85806 | 1.45012  |
| C | -3.66823  | -2.74299 | 1.38726  |
| C | -3.21098  | -1.47276 | 1.66864  |
| C | -3.33900  | -5.24063 | 1.14004  |
| C | -3.88401  | -5.34691 | -0.26918 |
| C | -5.25056  | -5.48114 | -0.51346 |
| C | -5.75178  | -5.57353 | -1.80523 |
| C | -4.89120  | -5.52355 | -2.91142 |
| C | -3.51459  | -5.38187 | -2.66924 |
| C | -3.02939  | -5.29992 | -1.37397 |
| N | -5.38394  | -5.62023 | -4.21781 |
| C | -4.59026  | -6.19008 | -5.25584 |
| C | -3.96143  | -7.42307 | -5.08035 |
| C | -3.19681  | -7.97147 | -6.10358 |
| C | -3.05388  | -7.32356 | -7.33239 |
| C | -3.69625  | -6.09415 | -7.49724 |
| C | -4.44954  | -5.52807 | -6.47586 |
| C | -2.26141  | -7.94306 | -8.45437 |
| C | 3.87167   | 1.54675  | 0.59649  |
| C | -6.70175  | -5.18480 | -4.53818 |
| C | -7.55889  | -6.01159 | -5.26769 |
| C | -8.83464  | -5.57756 | -5.60156 |
| C | -9.30194  | -4.31915 | -5.21139 |
| C | -8.43743  | -3.50532 | -4.47860 |
| C | -7.15095  | -3.92246 | -4.15247 |
| C | -10.68830 | -3.86108 | -5.58411 |
| C | -2.18620  | 0.94011  | 2.96671  |
| C | -2.19991  | 2.28832  | 2.57749  |
| C | -2.99945  | 3.18835  | 3.25753  |
| C | -3.79285  | 2.78637  | 4.34214  |
| C | -3.76265  | 1.43861  | 4.71894  |
| C | -2.97633  | 0.51903  | 4.04481  |
| C | -4.63547  | 3.78466  | 5.08390  |
| H | -6.81723  | -5.70041 | -1.96068 |
| H | -5.94421  | -5.54359 | 0.32220  |
| H | -1.95702  | -5.19564 | -1.22291 |
| H | -2.82629  | -5.34260 | -3.50604 |
| H | -9.48535  | -6.23652 | -6.17118 |
| H | -7.21754  | -6.99464 | -5.57663 |
| H | -6.48910  | -3.26576 | -3.59584 |
| H | -8.76886  | -2.51772 | -4.16801 |
| H | -10.92713 | -2.89802 | -5.12445 |
| H | -10.78983 | -3.74594 | -6.66906 |
| H | -11.44651 | -4.58306 | -5.26265 |
| H | -4.07187  | -7.95237 | -4.13870 |
| H | -3.60009  | -5.56308 | -8.44098 |
| H | -4.93851  | -4.56996 | -6.62278 |
| H | -2.94874  | -0.51712 | 4.36446  |
| H | -4.35926  | 1.10637  | 5.56305  |
| H | -3.01992  | 4.22598  | 2.93709  |
| H | -1.60805  | 2.61251  | 1.72832  |
| H | -5.34814  | 3.29392  | 5.75063  |
| H | -4.00633  | 4.44355  | 5.69344  |
| H | -5.19522  | 4.42147  | 4.39213  |
| H | -0.80171  | -4.49740 | 1.86242  |
| H | 0.04687   | -2.23824 | 2.34645  |
| H | -3.87860  | -0.62112 | 1.59766  |

|   |          |          |          |
|---|----------|----------|----------|
| H | -4.70316 | -2.88324 | 1.09087  |
| H | 0.36519  | 1.46904  | 3.67697  |
| H | 2.02698  | 0.06060  | -0.77284 |
| H | -0.23450 | -0.59656 | -0.05388 |
| H | -2.71347 | -8.93240 | -5.94628 |
| H | -1.76212 | -7.18072 | -9.05996 |
| H | -2.91150 | -8.51779 | -9.12466 |
| H | -1.49693 | -8.62686 | -8.07444 |
| H | 2.62197  | 2.12278  | 2.94409  |
| H | 4.11735  | 1.14870  | -0.39046 |
| H | 4.62631  | 1.18828  | 1.30467  |
| H | 3.96143  | 2.63757  | 0.55418  |
| H | -4.13271 | -5.48927 | 1.85436  |
| H | -2.53861 | -5.97114 | 1.29835  |

**Compound C in methylene chloride**

95

|   |          |          |          |
|---|----------|----------|----------|
| C | -0.00991 | -0.00206 | 0.01705  |
| C | -0.00743 | -0.00088 | 1.41482  |
| C | 1.22400  | -0.02507 | 2.07696  |
| C | 2.41264  | -0.06161 | 1.35689  |
| C | 2.42149  | -0.05928 | -0.04033 |
| C | 1.18657  | -0.02084 | -0.69167 |
| N | -1.22299 | 0.02856  | 2.14236  |
| C | -2.28637 | 0.86603  | 1.71535  |
| C | -2.04625 | 2.17026  | 1.29697  |
| C | -3.08933 | 2.99358  | 0.86836  |
| C | -4.40857 | 2.52318  | 0.88149  |
| C | -4.65828 | 1.19970  | 1.29952  |
| C | -3.60025 | 0.39065  | 1.70099  |
| C | -5.55471 | 3.43190  | 0.47007  |
| C | -5.07800 | 4.55102  | -0.45517 |
| C | -3.95673 | 5.32019  | 0.24311  |
| C | -2.74338 | 4.38133  | 0.36499  |
| C | -4.40218 | 5.84785  | 1.59687  |
| C | -5.44541 | 5.22401  | 2.29357  |
| C | -6.23553 | 4.08075  | 1.68756  |
| C | -3.75965 | 6.95958  | 2.17940  |
| C | -4.14663 | 7.39885  | 3.44175  |
| C | -5.17619 | 6.76893  | 4.14519  |
| C | -5.82241 | 5.68878  | 3.55465  |
| C | -6.05122 | 0.61531  | 1.28383  |
| N | -5.55029 | 7.22308  | 5.43770  |
| C | -5.70514 | 8.61041  | 5.67998  |
| C | -5.23081 | 9.18949  | 6.86282  |
| C | -5.38880 | 10.54951 | 7.09525  |
| C | -6.00522 | 11.38547 | 6.15834  |
| C | -6.46473 | 10.79996 | 4.97826  |
| C | -6.32861 | 9.43484  | 4.74105  |
| C | -2.65846 | 7.70220  | 1.45988  |
| C | -6.16684 | 12.86085 | 6.42338  |
| C | 3.71442  | -0.12220 | -0.81315 |
| C | -1.37766 | -0.77302 | 3.30088  |
| C | -0.91573 | -2.09347 | 3.32529  |
| C | -1.06893 | -2.87387 | 4.46448  |
| C | -1.69779 | -2.37884 | 5.61092  |
| C | -2.16533 | -1.06421 | 5.57163  |
| C | -2.00237 | -0.26656 | 4.44297  |
| C | -1.84555 | -3.23067 | 6.84605  |
| C | -5.77442 | 6.28611  | 6.47632  |

|   |          |          |          |
|---|----------|----------|----------|
| C | -4.93180 | 5.17890  | 6.63142  |
| C | -5.15603 | 4.25806  | 7.64615  |
| C | -6.21054 | 4.40979  | 8.55264  |
| C | -7.03935 | 5.52069  | 8.39403  |
| C | -6.83618 | 6.44195  | 7.36980  |
| H | -2.26438 | 8.50667  | 2.08619  |
| H | -1.82158 | 7.05003  | 1.19124  |
| H | -4.73632 | 8.56742  | 7.60227  |
| H | -5.01053 | 10.97331 | 8.02278  |
| H | -3.63966 | 8.24803  | 3.89051  |
| H | -3.02138 | 8.15461  | 0.52964  |
| H | 4.51527  | 0.41491  | -0.29556 |
| H | -5.20520 | 13.33292 | 6.65282  |
| H | -1.97833 | 4.81891  | 1.01443  |
| H | 3.60406  | 0.31276  | -1.81091 |
| H | 3.35599  | -0.07801 | 1.89774  |
| H | -2.28071 | 4.28387  | -0.62708 |
| H | -1.02977 | 2.55451  | 1.29860  |
| H | -3.66058 | 6.16706  | -0.38396 |
| H | 4.04888  | -1.15865 | -0.94293 |
| H | -6.82774 | 13.04252 | 7.27861  |
| H | -7.50523 | 7.29021  | 7.26521  |
| H | -4.09901 | 5.04100  | 5.94915  |
| H | 1.24875  | -0.01401 | 3.16205  |
| H | 1.15501  | -0.01611 | -1.77860 |
| H | -6.59420 | 13.37450 | 5.55755  |
| H | -2.36897 | 0.75511  | 4.44434  |
| H | -0.95483 | 0.01910  | -0.51668 |
| H | -6.70503 | 9.00586  | 3.81777  |
| H | -4.70937 | 4.13987  | -1.40258 |
| H | -6.95152 | 11.41865 | 4.22833  |
| H | -5.91628 | 5.21720  | -0.69193 |
| H | -6.63300 | 5.19600  | 4.08494  |
| H | -2.65989 | -0.64613 | 6.44508  |
| H | -7.21516 | 4.46558  | 1.37139  |
| H | -0.43607 | -2.50875 | 2.44453  |
| H | -6.43873 | 3.33424  | 2.46208  |
| H | -3.79675 | -0.63173 | 2.01000  |
| H | -6.30766 | 2.83321  | -0.05229 |
| H | -0.89809 | -3.30557 | 7.39299  |
| H | -2.58867 | -2.81200 | 7.53081  |
| H | -0.70276 | -3.89791 | 4.45518  |
| H | -6.74902 | 1.18763  | 1.90307  |
| H | -6.04143 | -0.41136 | 1.65869  |
| H | -6.46805 | 0.59428  | 0.27024  |
| H | -2.15464 | -4.25025 | 6.59376  |
| H | -4.48598 | 3.40677  | 7.74282  |
| H | -7.87270 | 5.66819  | 9.07658  |
| C | -6.43449 | 3.40688  | 9.65592  |
| H | -7.29790 | 3.67867  | 10.26989 |
| H | -6.61291 | 2.40345  | 9.25347  |
| H | -5.56273 | 3.33920  | 10.31646 |

**Radical cation of compound C in methylene chloride**

95

|   |          |          |          |
|---|----------|----------|----------|
| C | -0.03752 | -0.03071 | -0.01268 |
| C | -0.01925 | -0.04999 | 1.38934  |
| C | 1.20680  | -0.09497 | 2.07165  |
| C | 2.38788  | -0.11190 | 1.35328  |
| C | 2.38860  | -0.09938 | -0.04925 |



|   |          |          |          |
|---|----------|----------|----------|
| C | 1.15659  | -0.05960 | -0.71302 |
| N | -1.22771 | -0.02444 | 2.11182  |
| C | -2.29183 | 0.78165  | 1.67784  |
| C | -2.03874 | 2.04045  | 1.12370  |
| C | -3.08836 | 2.84633  | 0.70292  |
| C | -4.41446 | 2.39584  | 0.83790  |
| C | -4.67063 | 1.10970  | 1.37296  |
| C | -3.61303 | 0.32228  | 1.79462  |
| C | -5.56747 | 3.29162  | 0.43196  |
| C | -5.13867 | 4.33586  | -0.59802 |
| C | -3.96540 | 5.13277  | -0.02941 |
| C | -2.75917 | 4.18467  | 0.07442  |
| C | -4.31167 | 5.75804  | 1.31183  |
| C | -5.31319 | 5.20314  | 2.11739  |
| C | -6.15432 | 4.03183  | 1.64930  |
| C | -3.61908 | 6.89618  | 1.77393  |
| C | -3.92030 | 7.42990  | 3.02239  |
| C | -4.91436 | 6.87263  | 3.83383  |
| C | -5.60719 | 5.76155  | 3.36214  |
| C | -6.07001 | 0.55387  | 1.45991  |
| N | -5.20475 | 7.42954  | 5.10164  |
| C | -5.21538 | 8.83831  | 5.27876  |
| C | -4.62118 | 9.41498  | 6.40567  |
| C | -4.64205 | 10.79213 | 6.58671  |
| C | -5.23759 | 11.64257 | 5.64987  |
| C | -5.81714 | 11.05688 | 4.52326  |
| C | -5.81845 | 9.67702  | 4.33995  |
| C | -2.55649 | 7.56769  | 0.93626  |
| C | -5.26555 | 13.13451 | 5.86414  |
| C | 3.68131  | -0.14779 | -0.81307 |
| C | -1.36603 | -0.81073 | 3.27275  |
| C | -0.83178 | -2.10818 | 3.31156  |
| C | -0.98109 | -2.87412 | 4.45288  |
| C | -1.64615 | -2.37664 | 5.58298  |
| C | -2.16794 | -1.07873 | 5.52786  |
| C | -2.03878 | -0.29872 | 4.39100  |
| C | -1.77525 | -3.21399 | 6.82364  |
| C | -5.54954 | 6.58877  | 6.19139  |
| C | -4.80825 | 5.43396  | 6.46590  |
| C | -5.14925 | 4.61496  | 7.53413  |
| C | -6.22385 | 4.92116  | 8.37633  |
| C | -6.94930 | 6.08001  | 8.09945  |
| C | -6.62775 | 6.89996  | 7.02073  |
| H | -2.11731 | 8.41092  | 1.47512  |
| H | -1.74316 | 6.88604  | 0.66800  |
| H | -4.14229 | 8.77729  | 7.14236  |
| H | -4.17248 | 11.21592 | 7.47133  |
| H | -3.37554 | 8.30035  | 3.37444  |
| H | -2.97083 | 7.95457  | -0.00188 |
| H | 4.42546  | 0.52235  | -0.37266 |
| H | -4.29000 | 13.50954 | 6.19041  |
| H | -1.94267 | 4.65051  | 0.63429  |
| H | 3.53879  | 0.13151  | -1.85965 |
| H | 3.33277  | -0.12416 | 1.88837  |
| H | -2.37103 | 3.99894  | -0.93632 |
| H | -1.01887 | 2.40470  | 1.05524  |
| H | -3.70059 | 5.92768  | -0.73285 |
| H | 4.10248  | -1.15966 | -0.79019 |
| H | -5.99316 | 13.41058 | 6.63642  |
| H | -7.21588 | 7.79083  | 6.82409  |
| H | -3.96153 | 5.18104  | 5.83530  |

|   |          |          |          |
|---|----------|----------|----------|
| H | 1.22412  | -0.08150 | 3.15569  |
| H | 1.13336  | -0.06060 | -1.79842 |
| H | -5.54148 | 13.66255 | 4.94702  |
| H | -2.42884 | 0.71283  | 4.37265  |
| H | -0.98363 | -0.02388 | -0.54225 |
| H | -6.28665 | 9.24794  | 3.45955  |
| H | -4.84231 | 3.85588  | -1.53796 |
| H | -6.28956 | 11.68864 | 3.77512  |
| H | -5.98491 | 4.99517  | -0.82101 |
| H | -6.39257 | 5.32171  | 3.97011  |
| H | -2.67723 | -0.66966 | 6.39506  |
| H | -7.14853 | 4.40360  | 1.36868  |
| H | -0.33548 | -2.51643 | 2.43816  |
| H | -6.31345 | 3.34434  | 2.48602  |
| H | -3.80121 | -0.67283 | 2.18246  |
| H | -6.35854 | 2.66684  | 0.00718  |
| H | -0.81859 | -3.26010 | 7.35687  |
| H | -2.52048 | -2.80253 | 7.50844  |
| H | -0.58409 | -3.88479 | 4.46752  |
| H | -6.73348 | 1.19581  | 2.04601  |
| H | -6.06288 | -0.43335 | 1.92731  |
| H | -6.51812 | 0.44898  | 0.46592  |
| H | -2.05883 | -4.24187 | 6.57852  |
| H | -4.55635 | 3.72368  | 7.72688  |
| H | -7.79240 | 6.34741  | 8.73152  |
| C | -6.57504 | 4.02883  | 9.53982  |
| H | -7.44033 | 4.41347  | 10.08670 |
| H | -6.81438 | 3.01299  | 9.20614  |
| H | -5.74129 | 3.94874  | 10.24633 |

#### TTA in methylene chloride

43

|   |          |          |          |
|---|----------|----------|----------|
| C | -0.00373 | 0.01362  | 0.00936  |
| C | -0.00089 | 0.00312  | 1.40552  |
| C | 1.23122  | -0.01233 | 2.06892  |
| C | 2.41933  | -0.02574 | 1.34990  |
| C | 2.42826  | -0.00615 | -0.04860 |
| C | 1.19437  | 0.01804  | -0.69962 |
| N | -1.21581 | 0.00915  | 2.13644  |
| C | -1.36360 | -0.82727 | 3.27181  |
| C | -1.97972 | -0.35057 | 4.43430  |
| C | -2.12985 | -1.17513 | 5.54168  |
| C | -1.65944 | -2.49236 | 5.54176  |
| C | -1.03934 | -2.95461 | 4.38041  |
| C | -0.89852 | -2.14357 | 3.25765  |
| C | -1.81661 | -3.37130 | 6.75659  |
| C | 3.72608  | -0.00763 | -0.81588 |
| C | -2.28933 | 0.83758  | 1.72279  |
| C | -2.06027 | 2.14924  | 1.30158  |
| C | -3.11838 | 2.95371  | 0.88875  |
| C | -4.43478 | 2.49018  | 0.89683  |
| C | -4.65395 | 1.17906  | 1.33051  |
| C | -3.60456 | 0.36022  | 1.72814  |
| C | -5.58028 | 3.36002  | 0.44485  |
| H | 1.25432  | -0.01641 | 3.15412  |
| H | 3.36284  | -0.03905 | 1.89077  |
| H | 1.16303  | 0.02820  | -1.78632 |
| H | -0.94840 | 0.02187  | -0.52517 |
| H | -2.34409 | 0.67149  | 4.46574  |
| H | -2.61375 | -0.77991 | 6.43194  |

|   |          |          |          |
|---|----------|----------|----------|
| H | -0.66698 | -3.97538 | 4.34276  |
| H | -0.42188 | -2.53416 | 2.36404  |
| H | -3.80335 | -0.65736 | 2.04942  |
| H | -5.66687 | 0.78334  | 1.34726  |
| H | -2.91151 | 3.97094  | 0.56542  |
| H | -1.04807 | 2.54121  | 1.29524  |
| H | -1.43627 | -4.37924 | 6.56825  |
| H | -1.27204 | -2.96414 | 7.61609  |
| H | -2.86766 | -3.45910 | 7.05280  |
| H | -5.25485 | 4.39159  | 0.28300  |
| H | -6.00931 | 2.99578  | -0.49594 |
| H | -6.38810 | 3.37351  | 1.18418  |
| H | 3.54828  | -0.02444 | -1.89487 |
| H | 4.32401  | 0.88252  | -0.58972 |
| H | 4.33849  | -0.88029 | -0.56339 |

### Radical cation of TTA in methylene chloride

43

|   |          |          |          |
|---|----------|----------|----------|
| C | -0.01387 | 0.01916  | 0.00984  |
| C | -0.00739 | -0.00032 | 1.41251  |
| C | 1.21413  | -0.01713 | 2.10589  |
| C | 2.40092  | -0.00817 | 1.39786  |
| C | 2.41334  | 0.00489  | -0.00498 |
| C | 1.18646  | 0.01714  | -0.67969 |
| N | -1.22116 | 0.00026  | 2.12333  |
| C | -1.35327 | -0.77240 | 3.29201  |
| C | -0.77663 | -2.05168 | 3.35998  |
| C | -0.92022 | -2.80442 | 4.50981  |
| C | -1.62296 | -2.31300 | 5.62061  |
| C | -2.18557 | -1.03398 | 5.53722  |
| C | -2.06275 | -0.26705 | 4.39091  |
| C | -1.75931 | -3.14473 | 6.86394  |
| C | 3.71368  | -0.01001 | -0.75662 |
| C | -2.30353 | 0.77455  | 1.66709  |
| C | -3.61236 | 0.27365  | 1.75326  |
| C | -4.66888 | 1.04125  | 1.29885  |
| C | -4.46277 | 2.31894  | 0.75965  |
| C | -3.15105 | 2.80669  | 0.69002  |
| C | -2.07830 | 2.05068  | 1.12815  |
| C | -5.61766 | 3.13111  | 0.24731  |
| H | -3.78685 | -0.72206 | 2.14534  |
| H | -5.67630 | 0.63994  | 1.35363  |
| H | -2.97036 | 3.80204  | 0.29587  |
| H | -1.07235 | 2.45343  | 1.09009  |
| H | -0.25222 | -2.45603 | 2.50136  |
| H | -0.48929 | -3.80054 | 4.54780  |
| H | -2.72096 | -0.62837 | 6.38993  |
| H | -2.48366 | 0.73143  | 4.35227  |
| H | 1.22180  | -0.00124 | 3.18996  |
| H | 3.34125  | 0.00113  | 1.94091  |
| H | 1.17294  | 0.01563  | -1.76516 |
| H | -0.95480 | 0.00401  | -0.52866 |
| H | -2.37702 | -2.64559 | 7.61387  |
| H | -2.21251 | -4.11509 | 6.63569  |
| H | -0.77759 | -3.34393 | 7.30735  |
| H | 3.56775  | 0.22154  | -1.81420 |
| H | 4.41944  | 0.71324  | -0.33694 |
| H | 4.18447  | -0.99764 | -0.68974 |
| H | -5.38915 | 4.19974  | 0.25482  |
| H | -5.85130 | 2.85008  | -0.78663 |

H -6.51888 2.96214 0.84282

**Compound C in gas-phase**  
**95**

|   |          |          |          |
|---|----------|----------|----------|
| C | 0.00087  | 0.01205  | 0.01336  |
| C | -0.00037 | 0.00175  | 1.41056  |
| C | 1.22845  | -0.01549 | 2.07664  |
| C | 2.41868  | -0.03346 | 1.36014  |
| C | 2.43150  | -0.01875 | -0.03612 |
| C | 1.19917  | 0.01192  | -0.69093 |
| N | -1.21817 | 0.01260  | 2.13445  |
| C | -2.28477 | 0.84899  | 1.71674  |
| C | -2.04937 | 2.15397  | 1.29910  |
| C | -3.09577 | 2.97630  | 0.87967  |
| C | -4.41350 | 2.50465  | 0.90001  |
| C | -4.65846 | 1.18094  | 1.31776  |
| C | -3.59804 | 0.37247  | 1.71064  |
| C | -5.56293 | 3.41212  | 0.49635  |
| C | -5.09298 | 4.52891  | -0.43504 |
| C | -3.96977 | 5.30213  | 0.25567  |
| C | -2.75440 | 4.36576  | 0.37832  |
| C | -4.41265 | 5.83735  | 1.60695  |
| C | -5.45071 | 5.21512  | 2.31092  |
| C | -6.23666 | 4.06270  | 1.71714  |
| C | -3.77286 | 6.95476  | 2.17988  |
| C | -4.15788 | 7.40247  | 3.43872  |
| C | -5.18408 | 6.77520  | 4.14897  |
| C | -5.82720 | 5.68839  | 3.56804  |
| C | -6.05082 | 0.59497  | 1.31017  |
| N | -5.55731 | 7.23811  | 5.43734  |
| C | -5.69673 | 8.62745  | 5.67506  |
| C | -5.22363 | 9.20265  | 6.85971  |
| C | -5.36725 | 10.56413 | 7.08803  |
| C | -5.96695 | 11.40481 | 6.14581  |
| C | -6.42492 | 10.82300 | 4.96432  |
| C | -6.30389 | 9.45679  | 4.73043  |
| C | -2.67532 | 7.69543  | 1.45275  |
| C | -6.11339 | 12.88226 | 6.40730  |
| C | 3.72746  | -0.06150 | -0.80494 |
| C | -1.36736 | -0.80261 | 3.28349  |
| C | -0.88958 | -2.11715 | 3.29456  |
| C | -1.03596 | -2.91068 | 4.42453  |
| C | -1.67345 | -2.43589 | 5.57372  |
| C | -2.15663 | -1.12756 | 5.54742  |
| C | -2.00083 | -0.31587 | 4.42882  |
| C | -1.81351 | -3.30274 | 6.79907  |
| C | -5.79567 | 6.30825  | 6.47889  |
| C | -4.96512 | 5.19395  | 6.64299  |
| C | -5.20388 | 4.28144  | 7.66092  |
| C | -6.26027 | 4.44885  | 8.56106  |
| C | -7.07653 | 5.56663  | 8.39333  |
| C | -6.85960 | 6.48002  | 7.36614  |
| H | -2.27982 | 8.50318  | 2.07403  |
| H | -1.83766 | 7.04402  | 1.18385  |
| H | -4.74279 | 8.57426  | 7.60264  |
| H | -4.99049 | 10.98550 | 8.01744  |
| H | -3.65403 | 8.25668  | 3.88102  |
| H | -3.04174 | 8.14527  | 0.52234  |
| H | 4.52079  | 0.48180  | -0.28178 |
| H | -5.14794 | 13.34543 | 6.63976  |

|   |          |          |          |
|---|----------|----------|----------|
| H | -1.99436 | 4.80587  | 1.03211  |
| H | 3.61676  | 0.38138  | -1.79941 |
| H | 3.36087  | -0.04476 | 1.90335  |
| H | -2.28738 | 4.27034  | -0.61236 |
| H | -1.03289 | 2.53792  | 1.29519  |
| H | -3.67748 | 6.14654  | -0.37737 |
| H | 4.07486  | -1.09278 | -0.94261 |
| H | -6.77818 | 13.07432 | 7.25743  |
| H | -7.51748 | 7.33569  | 7.25253  |
| H | -4.13162 | 5.04573  | 5.96393  |
| H | 1.24712  | -0.01416 | 3.16180  |
| H | 1.17151  | 0.02482  | -1.77802 |
| H | -6.52986 | 13.39974 | 5.53817  |
| H | -2.37941 | 0.70125  | 4.43783  |
| H | -0.94387 | 0.02789  | -0.52070 |
| H | -6.67800 | 9.02849  | 3.80605  |
| H | -4.72899 | 4.11368  | -1.38273 |
| H | -6.89926 | 11.44645 | 4.21024  |
| H | -5.93261 | 5.19445  | -0.66985 |
| H | -6.63420 | 5.19760  | 4.10541  |
| H | -2.65826 | -0.72543 | 6.42445  |
| H | -7.22355 | 4.43794  | 1.41082  |
| H | -0.40246 | -2.51477 | 2.40989  |
| H | -6.42296 | 3.31705  | 2.49694  |
| H | -3.78996 | -0.65054 | 2.01997  |
| H | -6.31878 | 2.81168  | -0.02082 |
| H | -0.86592 | -3.37636 | 7.34620  |
| H | -2.56049 | -2.89901 | 7.48895  |
| H | -0.65724 | -3.93016 | 4.40570  |
| H | -6.74890 | 1.17081  | 1.92611  |
| H | -6.03918 | -0.42839 | 1.69410  |
| H | -6.46996 | 0.56276  | 0.29751  |
| H | -2.11637 | -4.32180 | 6.53634  |
| H | -4.54285 | 3.42390  | 7.76578  |
| H | -7.91125 | 5.72572  | 9.07171  |
| C | -6.49941 | 3.45430  | 9.66846  |
| H | -7.36304 | 3.73771  | 10.27721 |
| H | -6.68781 | 2.45028  | 9.27158  |
| H | -5.63256 | 3.38199  | 10.33524 |

**Radical cation of compound C in gas-phase**

95

|   |          |          |          |
|---|----------|----------|----------|
| C | 0.00887  | 0.01711  | -0.00488 |
| C | 0.01140  | 0.01433  | 1.39619  |
| C | 1.22971  | 0.01985  | 2.09117  |
| C | 2.41916  | 0.03850  | 1.38587  |
| C | 2.43681  | 0.03685  | -0.01639 |
| C | 1.21147  | 0.02472  | -0.69256 |
| N | -1.20868 | -0.00125 | 2.10811  |
| C | -2.28816 | 0.77622  | 1.67862  |
| C | -2.06822 | 2.03250  | 1.09646  |
| C | -3.13541 | 2.81538  | 0.68279  |
| C | -4.45419 | 2.34624  | 0.85116  |
| C | -4.67949 | 1.06126  | 1.40833  |
| C | -3.60343 | 0.29882  | 1.82399  |
| C | -5.62753 | 3.21977  | 0.46255  |
| C | -5.23811 | 4.26116  | -0.58652 |
| C | -4.06424 | 5.07960  | -0.05156 |
| C | -2.84230 | 4.14966  | 0.02857  |
| C | -4.38518 | 5.70900  | 1.29341  |

|   |          |          |          |
|---|----------|----------|----------|
| C | -5.35372 | 5.14539  | 2.13085  |
| C | -6.19396 | 3.96267  | 1.69030  |
| C | -3.70273 | 6.86321  | 1.72861  |
| C | -3.98282 | 7.40360  | 2.97704  |
| C | -4.94490 | 6.83727  | 3.82392  |
| C | -5.62547 | 5.70524  | 3.37814  |
| C | -6.06819 | 0.48437  | 1.52237  |
| N | -5.21504 | 7.40307  | 5.08215  |
| C | -5.13140 | 8.81236  | 5.27373  |
| C | -4.44526 | 9.33263  | 6.37293  |
| C | -4.37911 | 10.70527 | 6.57282  |
| C | -4.97774 | 11.60078 | 5.68208  |
| C | -5.65268 | 11.06813 | 4.58314  |
| C | -5.74116 | 9.69432  | 4.38241  |
| C | -2.67813 | 7.55063  | 0.85678  |
| C | -4.91143 | 13.08769 | 5.91842  |
| C | 3.73957  | 0.02664  | -0.76476 |
| C | -1.32741 | -0.81082 | 3.25990  |
| C | -0.77217 | -2.09884 | 3.27348  |
| C | -0.89899 | -2.88622 | 4.40332  |
| C | -1.56110 | -2.41932 | 5.54801  |
| C | -2.10244 | -1.12905 | 5.51798  |
| C | -1.99580 | -0.32820 | 4.39252  |
| C | -1.66468 | -3.27928 | 6.77567  |
| C | -5.63906 | 6.59222  | 6.16918  |
| C | -4.95246 | 5.41843  | 6.49485  |
| C | -5.36387 | 4.63782  | 7.56633  |
| C | -6.45592 | 5.00373  | 8.35962  |
| C | -7.12508 | 6.18210  | 8.03171  |
| C | -6.73226 | 6.96489  | 6.95007  |
| H | -2.23445 | 8.40062  | 1.38052  |
| H | -1.86050 | 6.88490  | 0.56066  |
| H | -3.96770 | 8.65435  | 7.07345  |
| H | -3.84098 | 11.08948 | 7.43601  |
| H | -3.44881 | 8.28942  | 3.30440  |
| H | -3.12844 | 7.93439  | -0.06619 |
| H | 4.45391  | 0.73037  | -0.32727 |
| H | -3.90019 | 13.40412 | 6.19380  |
| H | -2.02021 | 4.63582  | 0.56265  |
| H | 3.60178  | 0.28723  | -1.81670 |
| H | 3.35810  | 0.06419  | 1.93126  |
| H | -2.47705 | 3.95386  | -0.98959 |
| H | -1.05600 | 2.41331  | 1.00620  |
| H | -3.82805 | 5.87138  | -0.76873 |
| H | 4.19864  | -0.96806 | -0.72524 |
| H | -5.57938 | 13.38869 | 6.73384  |
| H | -7.27136 | 7.87689  | 6.71406  |
| H | -4.08963 | 5.12615  | 5.90392  |
| H | 1.23389  | 0.03946  | 3.17563  |
| H | 1.20048  | 0.01114  | -1.77823 |
| H | -5.20746 | 13.64703 | 5.02660  |
| H | -2.40273 | 0.67729  | 4.39342  |
| H | -0.93164 | -0.01449 | -0.54434 |
| H | -6.28357 | 9.30267  | 3.52723  |
| H | -4.96154 | 3.77789  | -1.53146 |
| H | -6.13258 | 11.73820 | 3.87437  |
| H | -6.09856 | 4.90678  | -0.79221 |
| H | -6.38981 | 5.25930  | 4.00743  |
| H | -2.60896 | -0.74180 | 6.39690  |
| H | -7.19829 | 4.32022  | 1.42772  |
| H | -0.27294 | -2.48224 | 2.39010  |

|   |          |          |          |
|---|----------|----------|----------|
| H | -6.32764 | 3.27861  | 2.53476  |
| H | -3.76885 | -0.69397 | 2.22809  |
| H | -6.41889 | 2.57800  | 0.06310  |
| H | -0.70289 | -3.32034 | 7.30002  |
| H | -2.40890 | -2.89317 | 7.47607  |
| H | -0.48503 | -3.89038 | 4.39849  |
| H | -6.73723 | 1.13041  | 2.09698  |
| H | -6.04387 | -0.49091 | 2.01393  |
| H | -6.52292 | 0.34615  | 0.53546  |
| H | -1.93678 | -4.30716 | 6.51789  |
| H | -4.81080 | 3.73196  | 7.80577  |
| H | -7.97768 | 6.49636  | 8.62798  |
| C | -6.88080 | 4.15569  | 9.53112  |
| H | -7.75447 | 4.58044  | 10.03290 |
| H | -7.14030 | 3.13857  | 9.21663  |
| H | -6.07970 | 4.07236  | 10.27414 |
